# Supplementary material for: Structure and Function Analysis of an Antibody Recognizing All Influenza A Subtypes
Source: PubMed Central journal article supplement — Cell. 2016 Jul 28;166(3):596–608. doi: 10.1016/j.cell.2016.05.073 (PMC4967455; doi:10.1016/j.cell.2016.05.073), 2016-07-28
Supplement: mmc2.pdf [file mmc2.pdf]

# Structure and Function Analysis of an Antibody Recognizing All Influenza A Subtypes

## Graphical Abstract

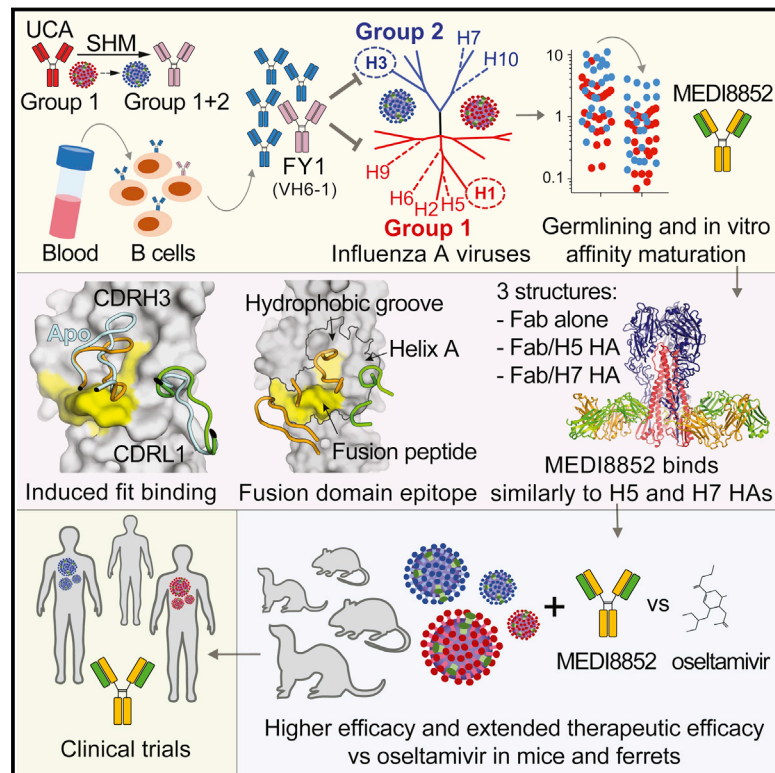

## Authors

Nicole L. Kallewaard, Davide Corti, Patrick J. Collins, ..., Qing Zhu, Steven J. Gamblin, John J. Skehel

## Correspondence

zhuq@medimmune.com (Q.Z.), john.skehel@crick.ac.uk (J.J.S.)

## In Brief

Identification of a human monoclonal antibody that reacts effectively with all influenza A hemagglutinin subtypes paves the way for developing immunotherapy for people infected with the flu virus.

## Highlights

- Binding to all influenza A subtypes neutralizing seasonal and pandemic strains
- Utilizes a rare VH (VH6-1) and carries a low level of somatic mutations
- Highly conserved epitope encompassing fusion peptide and hydrophobic groove
- Superior therapeutic window compared to oseltamivir in animals

## Accession Numbers

5JW5  
5JW4  
5JW3  
KX398429  
KX398468

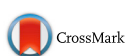

# Structure and Function Analysis of an Antibody Recognizing All Influenza A Subtypes

Nicole L. Kallewaard,<sup>1,8</sup> Davide Corti,<sup>2,8</sup> Patrick J. Collins,<sup>3,8</sup> Ursula Neu,<sup>3,8</sup> Josephine M. McAuliffe,<sup>1</sup> Ebony Benjamin,<sup>1</sup> Leslie Wachter-Rosati,<sup>1</sup> Frances J. Palmer-Hill,<sup>1</sup> Andy Q. Yuan,<sup>4</sup> Philip A. Walker,<sup>5</sup> Matthias K. Vorlaender,<sup>3</sup> Siro Bianchi,<sup>2</sup> Barbara Guarino,<sup>2</sup> Anna De Marco,<sup>2</sup> Fabrizia Vanzetta,<sup>2</sup> Gloria Agatic,<sup>2</sup> Mathilde Foglierini,<sup>6</sup> Debora Pinna,<sup>6</sup> Blanca Fernandez-Rodriguez,<sup>6</sup> Alexander Fruehwirth,<sup>6</sup> Chiara Silacci,<sup>6</sup> Rokhsana W. Ogradowicz,<sup>5</sup> Stephen R. Martin,<sup>5</sup> Federica Sallusto,<sup>6</sup> JoAnn A. Suzich,<sup>1</sup> Antonio Lanzavecchia,<sup>6,7,9</sup> Qing Zhu,<sup>1,9,\*</sup> Steven J. Gamblin,<sup>3,9</sup> and John J. Skehel<sup>3,9,\*</sup>

<sup>1</sup>Department of Infectious Disease and Vaccines, MedImmune LLC, One MedImmune Way, Gaithersburg, MD 20878, USA

<sup>2</sup>Humabs BioMed SA, Via Mirasole 1, 6500 Bellinzona, Switzerland

<sup>3</sup>Mill Hill Laboratory, The Francis Crick Institute, London NW7 1AA, UK

<sup>4</sup>Department of Antibody Discovery and Protein Engineering, MedImmune LLC, One MedImmune Way, Gaithersburg, MD 20878, USA

<sup>5</sup>Structural Biology Science Technology Platform, Mill Hill Laboratory, Francis Crick Institute, London NW7 1AA, UK

<sup>6</sup>Institute for Research in Biomedicine, Università della Svizzera italiana, 6500 Bellinzona, Switzerland

<sup>7</sup>Institute for Microbiology, ETH Zurich, Wolfgang-Pauli-Strasse 10, 8093 Zurich, Switzerland

<sup>8</sup>Co-first author

<sup>9</sup>Co-senior author

\*Correspondence: [zhuq@medimmune.com](mailto:zhuq@medimmune.com) (Q.Z.), [john.skehel@crick.ac.uk](mailto:john.skehel@crick.ac.uk) (J.J.S.)

<http://dx.doi.org/10.1016/j.cell.2016.05.073>

## SUMMARY

**Influenza virus remains a threat because of its ability to evade vaccine-induced immune responses due to antigenic drift. Here, we describe the isolation, evolution, and structure of a broad-spectrum human monoclonal antibody (mAb), MEDI8852, effectively reacting with all influenza A hemagglutinin (HA) subtypes. MEDI8852 uses the heavy-chain VH6-1 gene and has higher potency and breadth when compared to other anti-stem antibodies. MEDI8852 is effective in mice and ferrets with a therapeutic window superior to that of oseltamivir. Crystallographic analysis of Fab alone or in complex with H5 or H7 HA proteins reveals that MEDI8852 binds through a coordinated movement of CDRs to a highly conserved epitope encompassing a hydrophobic groove in the fusion domain and a large portion of the fusion peptide, distinguishing it from other structurally characterized cross-reactive antibodies. The unprecedented breadth and potency of neutralization by MEDI8852 support its development as immunotherapy for influenza virus-infected humans.**

## INTRODUCTION

Influenza virus infection remains a serious threat to global health and the world economy. Annual epidemics result in a high number of hospitalizations, with an estimated 3–5 million cases of severe disease and 250,000–500,000 deaths globally, and higher mortality rates are possible during pandemics (Wright et al., 2007). Given the emergence of anti-viral drug-

resistance, short treatment windows for antivirals and the lack of cross-protective vaccines, there is an unmet medical need for new therapeutic options that can effectively treat influenza infection.

There are three types of influenza viruses, A, B, and C causing disease in humans, and influenza A and B are responsible for frequent seasonal epidemics. However, influenza A infections account for the majority of hospitalizations and are the only type to cause pandemics (Wright et al., 2007). Influenza A is subtyped by its two major surface proteins, hemagglutinin (HA) and neuraminidase (NA). HA is the main target of neutralizing antibodies that are induced by infection or vaccination. The globular HA head domain mediates binding to the sialic acid receptor, while the HA stem mediates the subsequent fusion between the viral and cellular membranes that is triggered in endosomes by the low pH (Skehel and Wiley, 2000). Genetically, there are 16 influenza A subtypes of HA, which form two structurally and antigenically distinct groups (Nobusawa et al., 1991; Russell et al., 2004). In addition, two new HA analogs recovered from bats, H17 and H18, have been included in this classification (Tong et al., 2012, 2013). Currently, H1 and H3 HA subtypes are associated with human disease and viruses containing H5, H7, H9, and H10 HAs are associated with sporadic human infections due to direct transmission from avian species.

The majority of influenza virus neutralizing antibodies elicited by vaccination or infection bind to the globular head of HA and recognize homologous strains within a given subtype (Russell et al., 2008). These antibodies neutralize virus infectivity by blocking sialic acid receptor binding either directly (Knossow and Skehel, 2006; Schmidt et al., 2013) by interacting with the receptor binding site at the tip of the molecule or indirectly, by projecting over the binding site thereby rendering it inaccessible (Fleury et al., 1999; Xiong et al., 2015). These antibodies are involved in the selection of viruses with variant HAs in the

process of antigenic drift, necessitating the annual re-development of influenza vaccines.

In the past 8 years, several laboratories have described a new class of influenza-neutralizing antibodies that target conserved sites in the HA stem that showed different levels of cross-reactivity toward group 1 (Corti et al., 2010; Sui et al., 2009; Throsby et al., 2008; Wrammert et al., 2011), group 2 (Dunand et al., 2015; Ekiert et al., 2011; Friesen et al., 2014; Tan et al., 2014) and groups 1 and 2 viruses (Corti et al., 2011; Dreyfus et al., 2012; Nakamura et al., 2013; Wu et al., 2015). Anti-stem antibodies are less potent at direct viral neutralization as compared to anti-head antibodies, but were shown to induce potent antibody-dependent cellular cytotoxicity (ADCC) of infected cells in vitro and in vivo (Corti et al., 2011; DiLillo et al., 2016; DiLillo et al., 2014), while anti-head antibodies were not or less effective at mediating ADCC. In general, the human antibody response to the HA stem region is more frequent against group 1 as compared to group 2 HAs and is dominated by VH1-69 antibodies (Pappas et al., 2014; Sui et al., 2009; Wrammert et al., 2011). Although subdominant, the group 1 stem response was shown to be recalled after heterologous boosts by the new pandemic H1N1 virus in 2009 (Corti et al., 2011; Wrammert et al., 2011). The antibody response to the HA stem region of group 2 HAs is less frequent, possibly due to the presence of a conserved glycan bound to N38 in HA1 that may shield the access to the most conserved sites in the HA stem and to the lack of exposure to heterologous group 2 viruses (i.e., H7) or to new pandemic H3N2 viruses. Finally, antibodies capable of reacting with the HA stem region of both group 1 and 2 subtypes are extremely rare and usually do not show complete coverage of all subtypes. It has been hypothesized that such broadly cross-reactive antibodies might have potential as therapeutic agents and studies on their mechanism of action, epitope specificity, and ontogeny could also inform the design of cross-protective influenza virus vaccines (Corti and Lanzavecchia, 2013; Yewdell, 2013).

A problem related to the development of anti-stem antibodies as immunotherapeutics is their variable neutralizing potency against viruses belonging to different subtypes and the existence of natural escape mutants. In view of the limitations of group 1 and group 2 antibodies isolated so far, we searched for an antibody capable of potently neutralizing group 1 and 2 influenza A viruses within a narrow range of antibody concentrations. In this study, we isolated and optimized an antibody, named MEDI8852, that exhibited unprecedented breadth and potency, being able to neutralize a diverse panel of representative viruses spanning >80 years of antigenic evolution. Unlike other broadly neutralizing stem-reactive antibodies, MEDI8852 is unique in that it uses a rare VH (VH6-1) and carries a low level of somatic mutations. Crystallographic analysis of the Fab alone or in complex with H5 and H7 HA proteins reveals that MEDI8852 binds a highly conserved epitope on H5 and H7 that is markedly different from other structurally characterized stem-reactive neutralizing antibodies. The characterization of this unique epitope and the breadth and potency of neutralization exhibited by MEDI8852 support its development for immunotherapy in influenza virus-infected humans.

## RESULTS

### Isolation, Genetic Description, and Optimization of MEDI8852

Four broadly reactive antibodies were isolated from the memory B cells of a selected donor based on influenza A HA protein cross-reactivity as previously reported (Traggiai et al., 2004; Pappas et al., 2014). These antibodies (FY1, FY5, FY6, and FY18) belong to the same lineage carrying VH6-1\*01/D3-3\*01/JH3\*02 and VK1-39\*01/JK1\*01 gene segments (Figure 1A). We reconstructed the genealogical trees of this lineage and produced the unmutated common ancestor (UCA), the four clonally derived antibodies, and three antibodies representing the evolutionary branching points (BP) of the lineage (Figure 1B). Purified antibodies were tested for neutralizing activity against multiple viruses of different group 1 and 2 subtypes (Figure 1C). Interestingly, the UCA antibody exhibited neutralizing activity against group 1 viruses, but not group 2 viruses, albeit with lower potency as compared to some of the mutated antibodies. Of note, the first BP (BP1) gained neutralization activity toward early group 2 H3N2 viruses (HK/68 and VC/75). Two antibodies (i.e., FY1 and FY5) of this lineage acquired neutralization activity against group 2 viruses through two independent pathways of somatic mutations. The same analysis was extended to the lineage of FI6, a previously described antibody cross-neutralizing group 1 and group 2 viruses (Corti et al., 2011). Isolation of five additional antibodies from this lineage allowed the reconstruction of a complex genealogy tree (Figure S1). Similarly to what was observed for the FY1 lineage, the FI6-UCA antibody exhibited neutralizing activity against group 1 viruses only and evolved through two independent pathways of somatic mutations that led to the group 1-specific FI370 and FI6038 antibodies and to the group 1 and 2 cross-reactive antibodies FI6, FI2013 and FI4013. Taken together, these findings suggest that in both lineages, the UCA was initially selected by a group 1 virus and developed to a branching point characterized by cross-reactivity toward a limited number of group 2 viruses. From this point, the final antibody may have been selected further for binding to group 1 only (e.g., FY6 and FI370) or group 2 HAs (e.g., FY1 and FI6). These results are consistent with a model in which the development of cross-reactive group 1 and 2 antibodies is started by group 1 HAs and then further selected through boosts by group 2 HAs.

The FY1 antibody was chosen as the lead, based on its potency, breadth, and low somatic mutations for further in vitro optimization through parsimonious mutagenesis of the complementarity determining regions (CDRs) combined with reversion of unnecessary somatic mutations in the frameworks. The optimization focusing on affinity binding resulted in a 14-fold and 5-fold improved Fab affinity to H3 HA and H1 HA proteins determined by surface plasmon resonance, respectively (Table S2). The resulting antibody was named MEDI8852 (VH and VL sequences shown in Figure 1A) and was compared side by side with the parental FY1 antibody for binding and neutralization of a large panel of influenza A viruses. MEDI8852 showed higher binding activity as compared to FY1 against the group 1 HA proteins of H1, H2, H5, H6, and H9 subtypes and group 2 HA proteins of H3 and H7 subtypes, with a mean half-maximal effective

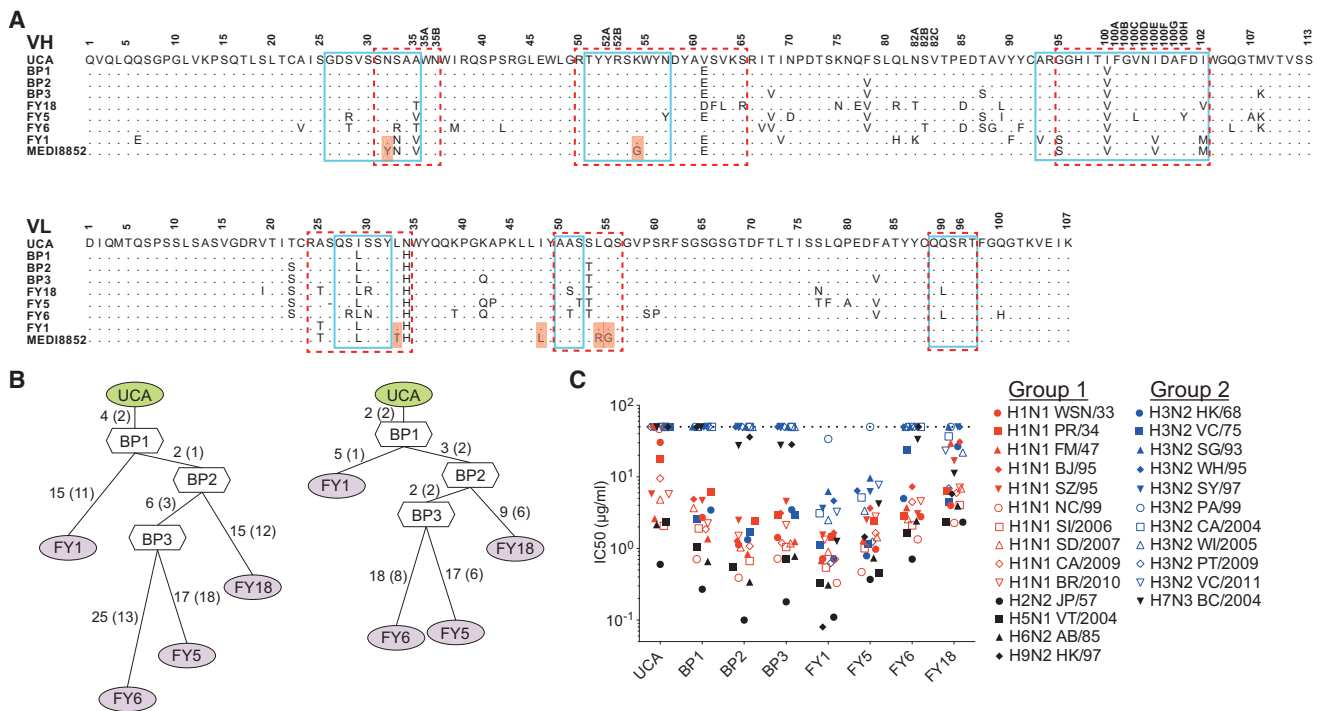

**Figure 1. Developmental Pathway of the MEDI8852 Lineage**

(A) Alignment of VH and VL amino acid sequences of four mutated antibodies with their UCA and branchpoint (BP) configurations and MEDI8852. Amino acid substitutions are highlighted in red. Residue positions are according to Kabat numbering. Dots indicate identical residues. Boxes indicate CDR borders according to IMGT (solid line) and Kabat (dashed line).

(B) Genealogy trees of VH (left) and VL (right) nucleotide sequences generated using dnaml. The number of mutations is indicated on the branches with amino acid substitutions in parentheses.

(C) Neutralization of influenza A viruses.  $IC_{50}$  values were determined against a panel of 25 influenza A isolates. Values above 50  $\mu\text{g/ml}$  were scored as negative (dashed line). Average  $IC_{50}$  values were obtained from at least two independent experiments. Full viral strains designations are listed in Table S1. See also Figure S1.

concentration ( $EC_{50}$ ) of 0.064  $\mu\text{g/ml}$  versus 0.124  $\mu\text{g/ml}$  for MEDI8852 and FY1, respectively (Figure 2B; Table S2). In addition, we investigated the binding of FY1 and MEDI8852 to the remaining HAs including the 1918 H1N1 pandemic strain and two recently identified HA analogs recovered from bats (H17 and H18) (Tong et al., 2012, 2013), by flow cytometric analysis of cell-surface expressed HAs (Figure 2C). Of note, MEDI8852 bound to all HAs and gained reactivity against H12 HA over the parental FY1 antibody.

To examine if the higher potency and breadth of binding activity of MEDI8852 as compared to FY1 translated into potent and broad antiviral activity, we measured neutralizing activity of both antibody variants in MDCK cells against a diverse panel of seasonal H1N1 and H3N2 viruses and emerging, potentially epidemic viruses, isolated over a period spanning >80 years (1933–2014). All seasonal influenza viruses tested were neutralized by FY1 and MEDI8852 with median  $IC_{50}$  values of 1.33  $\mu\text{g/ml}$  and 0.51  $\mu\text{g/ml}$ , respectively, resulting in nearly a 3-fold increase in overall potency (Figure 2D). However, both antibodies exhibited comparable activity in neutralizing group 1 and group 2 viruses with similar  $IC_{50}$  values (1.03 and 2.02  $\mu\text{g/ml}$  for FY1 and 0.34 and 0.61  $\mu\text{g/ml}$  for MEDI8852 against 18 H1N1 and 18 H3N2 viruses, respectively) (Figure 2D).

The increase in overall activity of MEDI8852 compared to FY1 was also apparent when tested against 13 non-seasonal influenza viruses including H5 and H7 viruses isolated from recent human infections. MEDI8852 neutralized these viruses having an overall median  $IC_{50}$  of 1.21  $\mu\text{g/ml}$  (range 4.05–0.41  $\mu\text{g/ml}$ ) versus FY1 with a median  $IC_{50}$  of 3.59  $\mu\text{g/ml}$  (range 11.05–0.76  $\mu\text{g/ml}$ ) (Figure 2E). These results indicate that the optimization of MEDI8852 resulted in a 3-fold increase in the potency of neutralization and the ability to bind to all HA subtypes of influenza A viruses.

To extend the evaluation, we directly compared the in vitro neutralization activity and breadth of MEDI8852 with the previously published cross-group neutralizing mAbs FI6v3, CR9114, and 39.29 (Corti et al., 2011; Dreyfus et al., 2012; Nakamura et al., 2013), using a diverse panel of seasonal and non-seasonal influenza strains from group 1 and group 2 (Figure 2F). As reported previously, these antibodies neutralized group 1 and group 2 viruses although they exhibited distinct differences in both potency and breadth. Among all the antibodies tested, MEDI8852 is the only one that demonstrated neutralizing activity against all the viruses tested with a median  $IC_{50}$  0.99  $\mu\text{g/ml}$  (range 8.75–0.09  $\mu\text{g/ml}$ ). CR9114 failed to neutralize the human H2N2 A/Japan/57 virus. Both FI6v3 and 39.29 were unable to



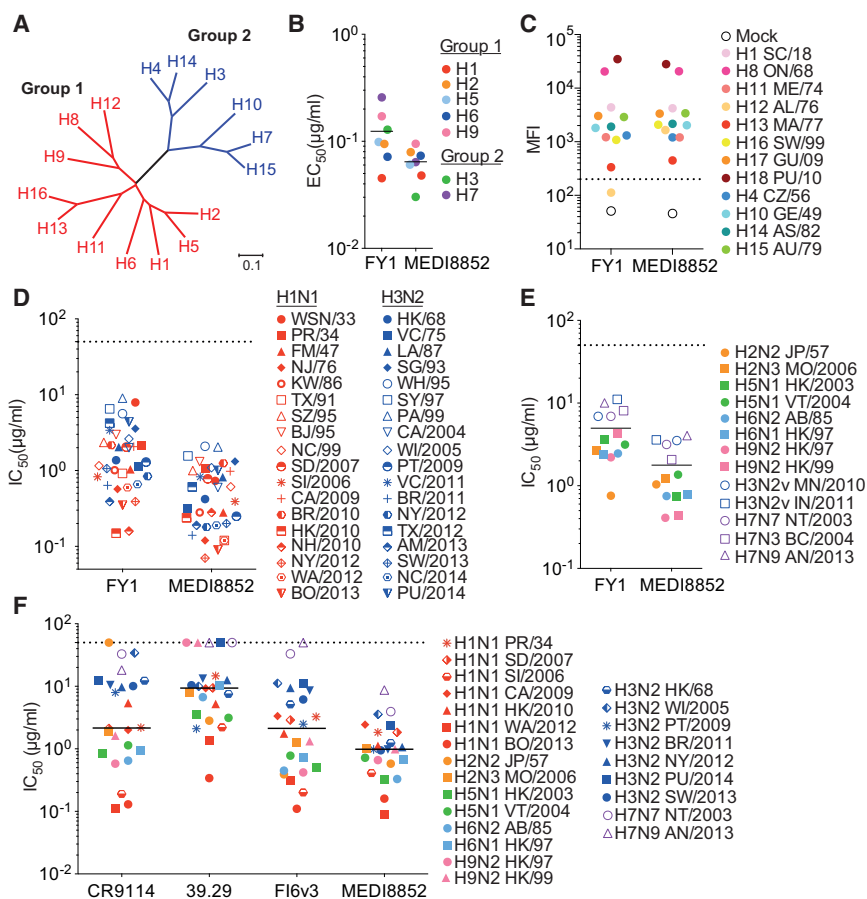

**Figure 2. MEDI8852 Binds to All Influenza A HA Subtypes and Exhibits Neutralization of Influenza A Seasonal and Non-seasonal Viral Strains**

(A) Phylogenetic tree of influenza A HAs. Group 1 and group 2 colored in red and blue are further subdivided into 3 clades (H8, H9, and H12; H1, H2, H5, and H6; H11, H13, and H16) and 2 clades (H3, H4, and H14; H7, H10, and H15), respectively.

(B) ELISA binding average  $EC_{50}$  values of FY1 and MEDI8852 to purified recombinant HA proteins.

(C) Binding of FY1 and MEDI8852 to surface-expressed HA proteins as determined by flow cytometry. Shown are MFI values.

(D and E) FY1 and MEDI8852 neutralization  $IC_{50}$  values were determined against a panel of 36 seasonal influenza A isolates (D) and 13 non-seasonal influenza viruses (E).

(F) Neutralization average  $IC_{50}$  values of MEDI8852, 39.29, Fl6v3, and CR9114 were determined from at least two independent experiments using a panel of 24 seasonal and non-seasonal influenza viruses and plotted as a single symbol. Full viral strains designations are listed in [Tables S1](#) and [S2](#).

neutralize the contemporary human isolate H7N9 A/Anhui/2013, and 39.29 was incapable of neutralizing the A/Netherlands/2003 H7N7 virus, both H9N2 viruses, and a contemporary H3N2 virus, A/Palau/2014, at the highest concentration tested (50  $\mu$ g/ml). In addition to better overall breadth of neutralization, MEDI8852 exhibits equal or greater neutralization potency than the other cross-reactive monoclonal antibodies with a median  $IC_{50}$  of 0.99  $\mu$ g/ml, compared to 2.13, 7.57, and 1.76  $\mu$ g/ml for CR9114, 39.29, and Fl6v3, respectively, when the non-neutralized viruses are excluded from the analysis.

### MEDI8852 Mechanisms of Antiviral Activity

The cross-subtype neutralizing antibodies reported to date inhibit HA-mediated membrane fusion activity in vitro (Corti et al., 2011; Dreyfus et al., 2012; Nakamura et al., 2013). Activation of fusion requires cleavage of the precursor, HA0, and exposure of the cleaved HA to the low pH of endosomes. In assays of these two processes, we have shown that MEDI8852 inhibits the host cell protease cleavage of both H1 (group 1) and H3 (group 2) HA0 that would prevent membrane fusion (Figure 3A), and MEDI8852 binding to cleaved HA also prevents its low pH-induced conformational change, which is required for membrane fusion by stabilizing the pre-fusion conformation (Figures 3B and 3C).

(CDC) of influenza-infected MDCK cells in the presence of complement (Figures 3D, 3E, 3F, and S2).

### Prophylactic and Therapeutic Efficacy of MEDI8852 in Mice and Ferrets

We evaluated the antiviral activity of MEDI8852 in mice challenged with a lethal dose of three different influenza A viruses, A/California/7/2009 H1N1 (CA/2009 H1), A/Wilson Smith N/33 H1N1 (WSN/33 H1), and a reassortant A/Hong Kong/8/68 H3N1 (rHK/68 H3). A dose-ranging study was conducted in which MEDI8852 was administered at the time of virus challenge. Mice (100%) receiving MEDI8852 at 3 or 1 mg/kg survived challenge with CA/2009 H1, while 60% and 20% of mice survived that received 0.3 and 0.1 mg/kg of MEDI8852, respectively (Figure 4A). Consistent with the survival data, lung viral titers were significantly reduced compared to control antibody-treated animals when MEDI8852 was administered at 3 mg/kg (Figure 4B). In addition, we observed that the two highest doses of MEDI8852 significantly protected lung function in mice compared to the control antibody as measured by pulse oximetry (Figure S3A).

To evaluate the therapeutic utility of MEDI8852, we administered MEDI8852 at different time points following infection with WSN/33 H1 or rHK/68 H3 virus. At a dose of 10 mg/kg, survival rates of 90%–100% were achieved even when treatment was

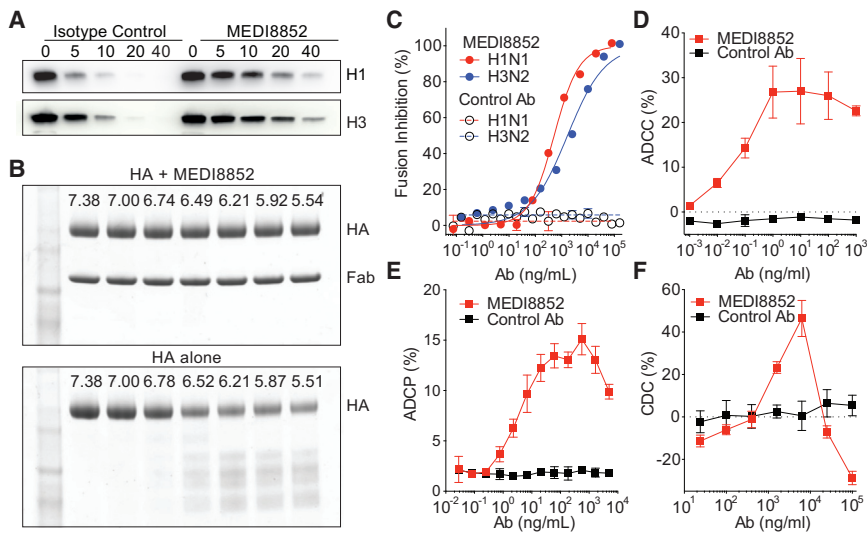

**Figure 3. MEDI8852's Antiviral Mechanisms of Action**

(A) HA cleavage inhibition assay of uncleaved HA0 recombinant proteins of A/New Caledonia/20/99 (H1N1) or A/Hong Kong/8/68 (H3N2), pre-treated with MEDI8852 or a non-relevant isotype control antibody, MPE8v3, after digestion with TPCK-trypsin for 0, 5, 10, 20, or 40 min.

(B) Inhibition of low pH-activated conformational change in HA showing SDS PAGE gels of H5 HA with and without MEDI8852, incubated at decreasing pH values and neutralized after digestion with TPCK- trypsin.

(C) Fusion inhibition assay using MEDI8852 (solid) or MPE8v3 (open) incubated with A/Puerto Rico/8/34 (H1N1) virus (red) or A/Aichi/2/68 (H3N2) virus (blue) and human red blood cells and exposed to low pH to induce viral fusion. Percent fusion inhibition was calculated based on the amount of hemoglobin present in the supernatant.

(D) ADCC activity on A549 cells infected with A/Puerto Rico/8/34 (H1N1) and incubated with MEDI8852 (red) or MPE8v3 (black) antibody in

the presence of human NK cells, antibody-dependent killing was measured in quadruplicate by LDH release.

(E) ADCP activity on MDCK cells expressing H1 HA from A/South Dakota/06/2007 that were labeled CFSE and incubated with MEDI8852 (red), or an irrelevant control, R347 (black) antibody in the presence of violet-labeled human macrophages in duplicate. Percent phagocytosis was determined by the amount of total macrophages that were labeled with violet and CFSE.

(F) CDC activity on MDCK cells infected with A/Puerto Rico/8/34 (H1N1) and incubated with a serial dilution of MEDI8852 (red) or MPE8v3 (black) antibody in the presence of rabbit complement. Antibody-dependent killing was measured in triplicate by LDH release. Error bars represent two times the SD at each antibody concentration.

See also [Figure S2](#).

delayed until day 4 post infection with WSN/33 H1, or day 3 post infection with rHK/68 H3 ([Figures 4C](#) and [4E](#)). Significant survival benefits were also seen with 1 and 3 mg/kg doses when administered on days 1, 2, or 3 post infection, albeit lower survival rates than the 10 mg/kg ([Table S3](#)). MEDI8852 treatment of 10 mg/kg at all times post infection resulted in significantly decreased viral titers, compared to control antibody treated and untreated animals, with a clear trend for greater reductions with earlier treatment ([Figures 4D](#) and [4F](#)).

To further investigate MEDI8852's therapeutic potential, we determined the therapeutic window for treating ferrets infected with the highly pathogenic avian influenza virus, A/Vietnam/1204/2004 H5N1 (VT/2004 H5N1). In these studies, ferrets were infected intranasally with 1 LD<sub>50</sub> of VT/2004 and then treated with a single intravenous (i.v.) dose of 25 mg/kg of MEDI8852 at 1, 2, or 3 days post infection. We also used as a comparator, the anti-influenza drug oseltamivir at 25 mg/kg twice a day (b.i.d.) ([Figure 4G](#)). As expected, all control animals showed signs of infection including fever peaking from days 1–3 post infection and 100% mortality by day 7 post infection ([Figures 4G](#) and [4H](#)). In comparison, ferrets treated with MEDI8852 or oseltamivir on day 1 post infection were completely protected. When treatment was delayed until 2 or 3 days post infection, MEDI8852 provided complete protection with 100% survival while oseltamivir only partially protected animals with survival rates of 71% and 29%, respectively. In addition, MEDI8852 treatment resulted in a period of fever reduction following administration, which was not observed in oseltamivir or control antibody-treated animals ([Figure 4H](#)). Similar efficacy and therapeutic window results were seen when MEDI8852 and oseltami-

vir treatments were compared in a lethal murine model ([Figures S3B](#) and [S3C](#)).

### The Structures of Complexes Formed between MEDI8852 Fab and H5, Group 1, and H7, Group 2, HAs

To provide insight into the structural basis for MEDI8852 breadth and potency, we have determined the structures of the MEDI8852 Fab fragment at 1.9 Å and of its complexes with H5 and H7 HA proteins at 3.7 Å and 3.75 Å resolution, respectively ([Figures 5A](#) and [S4A](#)). The structures of the HA proteins in both complexes are similar to those of the apo structures determined before ([Russell et al., 2004](#); [Xiong et al., 2015](#)). MEDI8852 makes similar contacts with both H5 and H7 HAs, by binding in a very similar orientation to both HAs ([Figures 5B–5D](#)), each Fab interacting with just one protomer of the HA trimer. Overall, the interactions bury 1,750 and 1,646 Å<sup>2</sup> from solvent for the H5 and H7 complexes, respectively, consistent with their high binding affinity ([Table S2](#)). MEDI8852 contacts the fusion domain of HA and interacts with three regions of HA2, a central hydrophobic groove, the fusion peptide and helix A, and with specific residues in the HA1 component of the fusion domain ([Figure 6](#)). The location of MEDI8852 in the complex with the HA proteins is consistent with the *in vitro* assays showing that MEDI8852 stabilized the pre-fusion conformation inhibiting fusion as well as blocking the proteolytic cleavage of the HA precursor on the neighboring subunit ([Figure 3](#)).

Although the structures of the complexes were determined at intermediate resolution, the interfaces between the HAs and MEDI8852 Fab are well-ordered and the electron density maps in these areas are among the clearest of the overall complexes

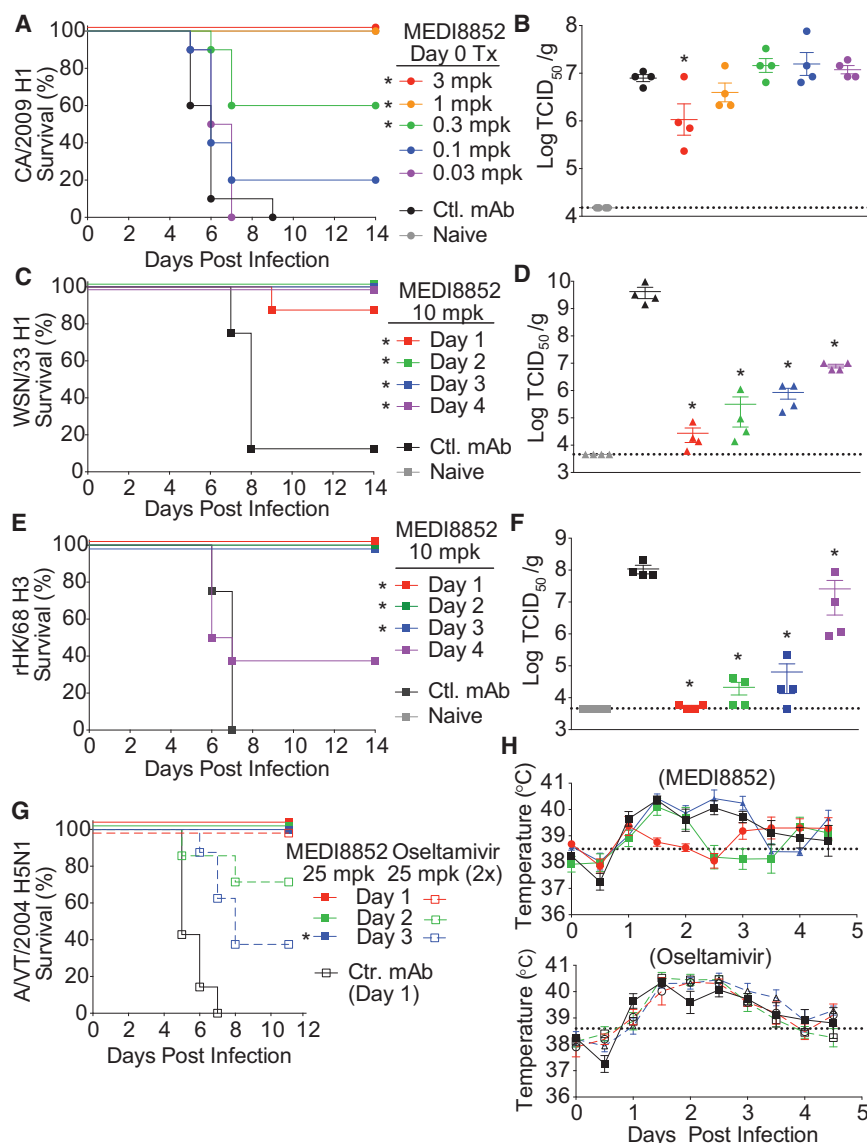

**Figure 4. MEDI8852 Provides Dose-Dependent Protection from Lethal Influenza Infection in Mice and Ferrets Even When Treatment Was Delayed**

(A) Kaplan-Meier survival curves. (B) Lung viral titers on day 5 post infection determined by TCID<sub>50</sub> assay after mice were treated with MEDI8852 at 3, 1, 0.3, 0.1, and 0.03 mg/kg (single i.p. dose) and then infected with CA/2009 H1. (C) Kaplan-Meier survival curves. (D) Lung viral titers on day 5 post infection in mice infected with WSN/33 H1 virus, on study day 0, then treated with MEDI8852 or irrelevant control antibody, R347 (single i.p. dose) at 10 mg/kg at various days post infection. (E) Kaplan-Meier survival curves. (F) Lung viral titers on day 5 post infection in mice infected with rHK/68 H3 virus, on study day 0, then treated with MEDI8852 at 10 mg/kg or R347 (single i.p. dose) at various days post infection. (G) Kaplan-Meier survival curves of ferrets infected with 1LD90 of A/Vietnam/1203/2004 H5N1 virus on study day 0. Treatment with MEDI8852 at 25 mg/kg (closed symbols solid line), oseltamivir at 25 mg/kg (open symbol dashed line), or R347 (open symbol solid line) was initiated at the indicated day post infection. (H) Temperature of ferrets treated with MEDI8852, or oseltamivir at various days post infection. Dotted line designates the average normal temperature of a ferret at 38.5°C. Error bars represent the SE of the mean for each determination. \*For murine studies, significance was determined compared to control antibody treatment with  $p < 0.005$  for survival (log-rank test) and  $p < 0.05$  for lung viral titers (Student's  $t$  test); for ferret survival studies, significance was determined by comparing to oseltamivir on the indicated initiation day with  $p < 0.05$  for survival (log-rank test). See also Figure S3 and Table S3.

(unbiased omit electron density maps are shown in Figures S4B and S4C). We can, therefore, have confidence in our description of the inter-molecular contacts: hydrogen bonds described in the text should be regarded as potential interactions, however, given the limitations of defining the exact geometry of these interactions. The principal contact areas involve three CDRs, CDRH3, CDRH2, and CDRL1, with minor interactions with CDRH1 and CDRL3 (Figure 6A). CDRH3 makes extensive contacts with the bottom of a hydrophobic groove between helix A of HA2 and the fusion domain component of HA1 (Figures 6B and 6C). Phe100A<sub>(CDRH3)</sub> inserts into this groove made by HA2 residues Ile45, Val48, Thr49, and Val52 of helix A, Trp21 of the fusion peptide, and Thr309 of HA1. Val100C<sub>(CDRH3)</sub> binds in a lower position in the same groove and interacts with the main chain of HA2 residues 19–21 of the fusion peptide as well as with the side chains of Trp21 and of HA1 His8 (Figure 6B). Asn100D<sub>(CDRH3)</sub> also makes hydrophobic contact with Val18 in

the fusion peptide (Figure 6C). In particular, HA2 Val18 is almost completely protected from solvent by Tyr56<sub>(CDRH2)</sub> and Arg52B<sub>(CDRH2)</sub>. There is also van der Waals interaction between the C $\alpha$  of HA2 Gly16 and Tyr52<sub>(CDRH2)</sub>. Tyr52<sub>(CDRH2)</sub> is positioned within hydrogen bonding distance of Gly16. Arg50<sub>(CDRH2)</sub> forms a salt bridge with HA2 Asp19. Arg50<sub>(CDRH2)</sub> also contributes to a polar patch on the antibody surface that includes Arg96<sub>(CDRL3)</sub> and Asp58<sub>(CDRH2)</sub> and Asp100F<sub>(CDRH3)</sub>. Finally, CDRL1 interacts with the N-terminal region of helix A of HA2 (Figure 6D). Ser30<sub>(CDRL1)</sub> and Ser31<sub>(CDRL1)</sub> are in hydrogen bonding distance of HA2 Gln42, while Tyr32<sub>(CDRL1)</sub> and Leu29<sub>(CDRL1)</sub> make hydrophobic contacts with the aliphatic moiety of HA2 Lys38 of helix A. The side chain of Tyr32<sub>(CDRL1)</sub> stacks against HA2 Gln42 of helix A and its hydroxyl group is in hydrogen bonding distance of the main chain of HA2 Asp19 of the fusion peptide.

The epitope recognized by MEDI8852 is highly conserved between both HA proteins, consistent with the antibody's broad



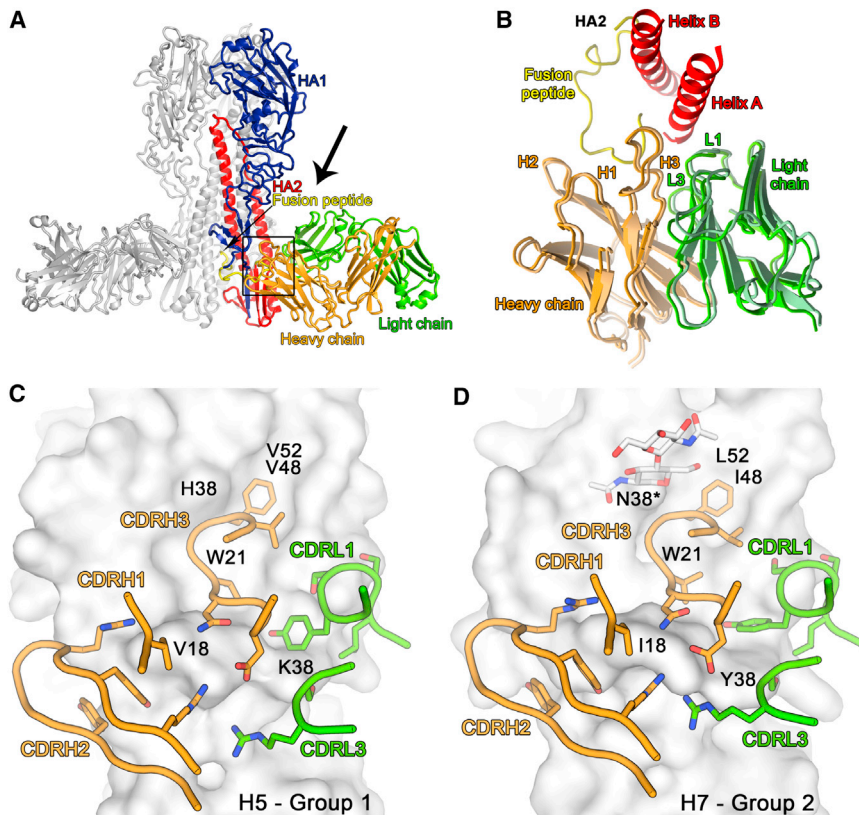

**Figure 5. MEDI8852 Binds to a Unique Site within the H5 and H7 HA Proteins**

(A) Overview of MEDI8852 in complex with H5 hemagglutinin. One HA protomer and the cognate MEDI8852 Fab fragment are highlighted in color, the other two copies in the trimer are colored gray. The HA1 polypeptide is colored blue, the HA2 polypeptide is colored red, with the fusion peptide at the N terminus of HA2 highlighted in yellow. The heavy chain of the MEDI8852 Fab is colored orange, the light chain is colored green.

(B) Overlay of MEDI8852 bound to group 1 (H5) and group 2 (H7) HAs. The antibodies are shown in cartoon representation together with Helices A and B of the HA. The components are colored according to (A) and the view orientation is approximately that shown by the black arrow in (A). (C and D) H5 (C) and H7 (D) HAs are shown in surface representation. Only the HA residues in the MEDI8852 binding epitope that differ between H5 and H7 are labeled. The CDR loops of MEDI8852 that are in contact with HA are shown in cartoon and stick representation and colored by element. See also Figures S4, S7, and Table S4.

activity against group 1 and group 2 influenza viruses (Figures 5C, 5D, and S5). However, the membrane proximal fusion domains of both group 1 and group 2 HAs have a few distinct structural differences such as glycosylation status of HA1 position 38, which could potentially affect the binding of some antibodies (Corti et al., 2011; Ekiert et al., 2009; Sui et al., 2009). In the H7 complex with MEDI8852, the bulky carbohydrate chain attached to HA1 Asn38 changes its orientation to allow antibody binding, as observed before in the Fl6 Fab-H3 HA complex (Corti et al., 2011). Another notable feature of the MEDI8852 complex with H7 HA is the involvement of HA2 Tyr38 in an aromatic stacking interaction with Tyr32<sub>(CDRL1)</sub>. Interestingly, the tyrosine at position 38 is not conserved across all HA subtypes only in H7, H10, and H15. The arginine in H6, H9, H11, and H12 could engage in a similar stacking interaction although the leucine, lysine, and glutamine found in the remaining HA proteins could not interact in the same way. Thus, the high and similar affinities with which MEDI8852 reacts with these HAs, suggests that the differences in glycosylation at HA1 38 and the side chain at HA2 38 make a minor contribution to the overall energetics of binding (Figure 2B; Table S2).

#### Conformational Rearrangements in MEDI8852 on Complex Formation

The availability of a high-resolution structure of MEDI8852 Fab and of well-ordered interfaces in the structures of the complexes formed with H5 and H7 HAs enables us to analyze conformational changes in the Fab upon HA binding, particularly in the

CDRH3 and CDRL1 loops. The loop formed by residues 97–100F of CDRH3 undergoes a largely rigid-body rotation, pivoted around Gly96<sub>(CDRH3)</sub> and Ala100G<sub>(CDRH3)</sub> (Figure 7A) to facilitate interactions with HA. As a consequence, the side chain of Phe100A<sub>(CDRH3)</sub> moves by  $\sim 5$  Å, to insert into the hydrophobic groove of the epitope, near HA2 48. In addition, residues 27–32<sub>(CDRL1)</sub> are restructured, with an average displacement of  $\sim 10$  Å between apo and bound forms. The reorientation of the side chains of Tyr32<sub>(CDRL1)</sub> and Leu29<sub>(CDRL1)</sub> enables them to interact with HA2 Tyr38 in the H7 complex. Ser30<sub>(CDRL1)</sub> and Ser31<sub>(CDRL1)</sub> in the complex form a helical structure that places them in hydrogen bonding distance with Gln42 of HA2.

There are five mutations found in the *in vitro* optimization of FY1 to MEDI8852 that are not in direct contact with HA, but are contained within CDR loops (Figures 6E and 6F). The mutated residues are seen to stabilize the conformations that the loop regions adopt in complex with HA while the parental residues (FY1) do not appear to be able to make similar stabilizing interactions (Figure S6). Thus, the optimization process of FY1 to MEDI8852 results in the selection of amino acid substitutions that stabilize the induced fit conformation that the CDR loops adopt in complex with HA.

#### Comparison of the Epitope of MEDI8852 with Those of Other Broadly Neutralizing Antibodies

We have compared the mode of interaction of MEDI8852 with other broadly neutralizing antibodies that recognize the membrane proximal fusion domain of HA. The cross-group neutralizing antibodies 39.29, Fl6v3, and CR9114 (Corti et al., 2011; Dreyfus et al., 2012; Nakamura et al., 2013), as well as the group 1-neutralizing antibodies F10 and CR6261 (Ekiert et al., 2009; Sui



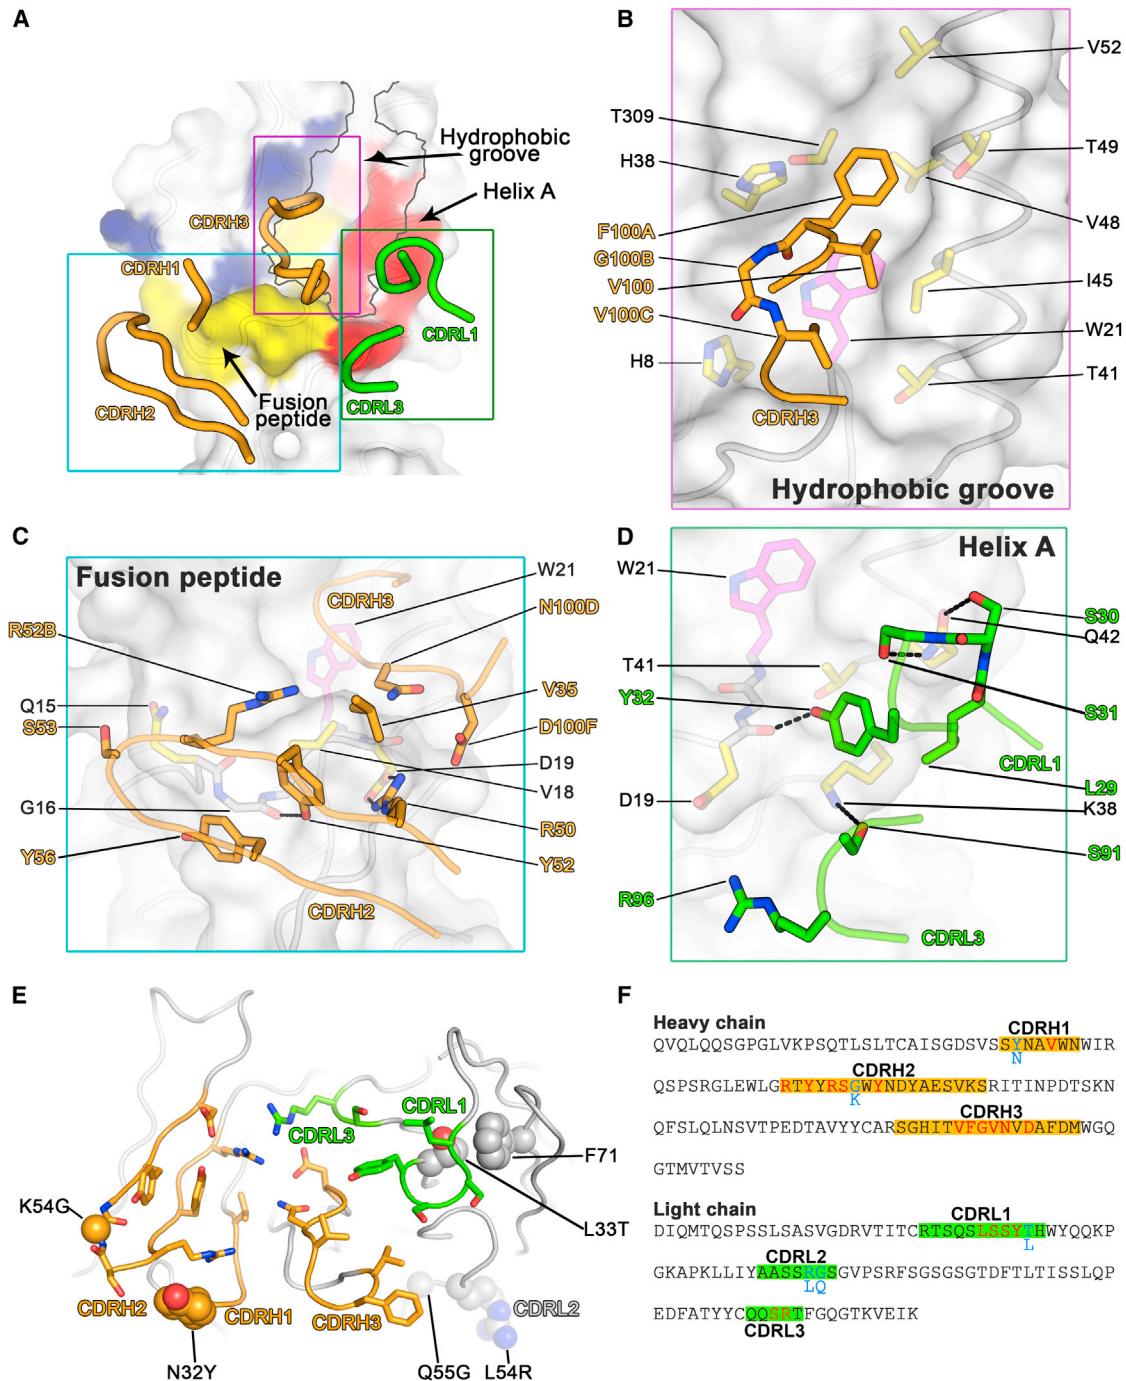

**Figure 6. Binding Epitope of MEDI8852 on H5 HA**

(A) HA is shown in surface representation and residues that are contacted by MEDI8852 are highlighted in color (blue for HA1, red for HA2 and yellow for fusion peptide residues). Secondary structure elements of HA are shown in cartoon representation. The hydrophobic groove on HA is outlined in gray. The CDR loops of MEDI8852 that are in contact with HA are shown in cartoon representation and colored orange and green for the heavy and light chains, respectively. The colored boxes indicate the three parts of the binding epitope that are shown in more detail in (B), (C), and (D).

(B) Interactions of MEDI8852 with the hydrophobic groove of H5 HA. HA is drawn in surface representation, with the main chain shown in cartoon representation and amino acids that are in contact with MEDI8852 shown in stick representation. W21, which adopts different rotamers in group1 and group 2 influenza viruses, is colored magenta. MEDI8852 is also shown in cartoon representation, with contact residues shown in stick representation. Hydrogen bonds and salt bridges are indicated by dashed lines.

(C) Interactions of MEDI8852 with the fusion peptide of H5 HA. Shown in the same style as in (B).

(D) Interactions of MEDI8852 with the base of helix A of H5 HA. Shown in the same style as in (B).

(legend continued on next page)

et al., 2009), all recognize helix A of HA2 and the adjacent hydrophobic groove (Figure 7B, blue box). In contrast, the group 2-neutralizing antibodies CR8020 and CR8043 (Ekiert et al., 2011; Friesen et al., 2014) recognize a different region of the fusion peptide and a small  $\beta$  sheet below it in the fusion domain (Figure 7B, red box). The epitope of MEDI8852, uniquely among the cross-group neutralizing antibodies reported to date, represents a combination of both regions. A structural comparison of HA-bound MEDI8852 overlapped with the antibodies CR8020 and CR9114 is shown in Figures S7A and S7B, which reveals that the overall orientation of MEDI8852 is such that it sits slightly higher on the HA than the CR8020 antibody and lower than CR9114. The nearest paratope residue of MEDI8852 is  $\sim 20$  Å from the membrane proximal end of the HA.

MEDI8852 and 39.29 antibodies bind similarly to residues in the hydrophobic groove and adjacent helix A in the fusion domain. Both antibodies contain the four amino acid sequence ValPheGlyVal/Ile in their otherwise dissimilar CDRH3 loops. These tetrapeptides superpose in the complexes with an all-atom root-mean-square deviation (RMSD) of 0.7 Å, indicating that they interact with their cognate HAs in a similar way (Figure 7C). However, other contacts made by these antibodies with HA are quite different between MEDI8852 and 39.29, reflecting the fact that the two antibodies are not particularly similar in sequence and are derived from different germline sequences (VH6-1\*01 and VK 1-39\*01 for MEDI8852 versus VH3-30\*01 and VK3-15\*01 for 39.29). MEDI8852 contacts the base of helix A and the fusion peptide with its CDRL1 and CDRH2 loops, respectively (Figure 6). By contrast, contacts made by the heavy chain of 39.29 Fab mainly involve CDRH3. 39.29 appears to bury helix A using all three light chain CDR loops. As a consequence, the 39.29-HA interaction buries a total of 2,287 Å<sup>2</sup>, while MEDI8852 achieves similar affinity with a smaller buried surface of 1,646 Å<sup>2</sup>.

MEDI8852 is the second cross-group neutralizing antibody for which structures of complexes with both group 1 and group 2 HAs have been reported. The first was Fl6v3, which, although it recognizes both group 1 and group 2 HAs, has higher in vivo neutralizing activity against group 1 viruses (Corti et al., 2011). The cross-group binding of Fl6v3 has been attributed to its long and flexible HCDR3, which can accommodate the differences in conformation and environment of HA2 Trp21 observed between group 1 and group 2 viruses. There is a much more significant rearrangement between Fl6v3 bound to H1 HA (group 1) versus H3 HA (group 2) than there is between MEDI8852 in its complexes with H5 HA (group 1) and H7 HA (group 2) which overlap very closely (Figures 5B and S7C). MEDI8852, therefore, binds in a very similar way to HAs of both groups. This greater structural conservation of the binding interface is likely responsible for its broader neutralizing ability.

## DISCUSSION

There is an unmet medical need for effective treatments against severe influenza. The potential of broadly infectivity-neutralizing antibodies used therapeutically to address this need has provided a stimulus for their isolation and characterization. Among the antibodies considered to date, the anti-HA human monoclonal antibody MEDI8852 has demonstrated significant breadth of its infectivity-neutralizing capacity. MEDI8852 reacts with HAs of all influenza antigenic subtypes, potentially neutralizes diverse virus strains with numerous HA subtypes, and can block infection and lethality caused by influenza viruses when administered up to 4 days after challenge with the virus in mice and up to 3 days post challenge in ferrets with the highly pathogenic H5N1 virus. This potential ability to overcome the unpredictable characteristics of influenza, namely the antigenic shift, that results in disease during pandemic periods, and the antigenic drift, that occurs with the emergence of antigenically novel viruses, is a major advantage for a candidate anti-influenza therapeutic antibody.

The mechanisms of MEDI8852-mediated neutralization of infection involve processes at the beginning and the end of the infection cycle. Binding of the antibody to HAs on the infecting virus inhibits HA-mediated membrane fusion that is required for the initiation of infection. At the end of infection, antibody binding to precursor HA0 can block its cleavage and prevent the formation and spread of newly made infectious virus. Additionally, binding of MEDI8852 to HAs displayed on the surfaces of infected cells results in their recognition and lysis by other components of the immune system: NK cells, macrophages, and complement. These multiple mechanisms exhibited by MEDI8852 presumably combine to ensure the observed effectiveness of antibody treatments in infected mice and ferrets.

The epitope recognized by MEDI8852 is consistent with the ways it blocks HA function in membrane fusion and with the locations of epitopes that have been described previously for influenza group-specific cross-reactive antibodies and for more broadly reactive antibodies. However, the regions of HA that interact with MEDI8852 are a combination of those previously assigned to group 1 specificity (primarily a hydrophobic groove and the adjacent helix A of HA) (Ekiert et al., 2009; Sui et al., 2009) or group 2 specificity (a separate part of the fusion peptide, near its N terminus) (Ekiert et al., 2011; Friesen et al., 2014). The structural characterization of MEDI8852 bound and unbound structures also highlight the coordinated movement of the CDRH3 and the CDRL1 to insert into the hydrophobic groove of the HA, as well as the rearrangement of the orientation of the glycan attached to Asn38 of the H7 virus to allow antibody binding. Importantly, structures of the complexes formed by MEDI8852 with H5 and H7 HAs indicate that the locations and

(E) Location of mutations found during affinity maturation of FY1 to MEDI8852. The variable domains of MEDI8852 are shown in cartoon representation, viewed from the direction of HA. Regions of the heavy and light chains in contact with HA are colored orange and green, respectively. Interacting sidechains are shown in stick representation. Residues that differ between the parental and affinity-matured antibody are shown in sphere representation.

(F) Sequences of MEDI8852 variable region framework and CDR residues. CDRs (according to Kabat) are highlighted in orange and green for the heavy and light chains respectively. Residues in contact with HA are colored red and residues changed during affinity maturation from FY1 are colored cyan, with corresponding residues of FY1 indicated.

See also Figure S6.

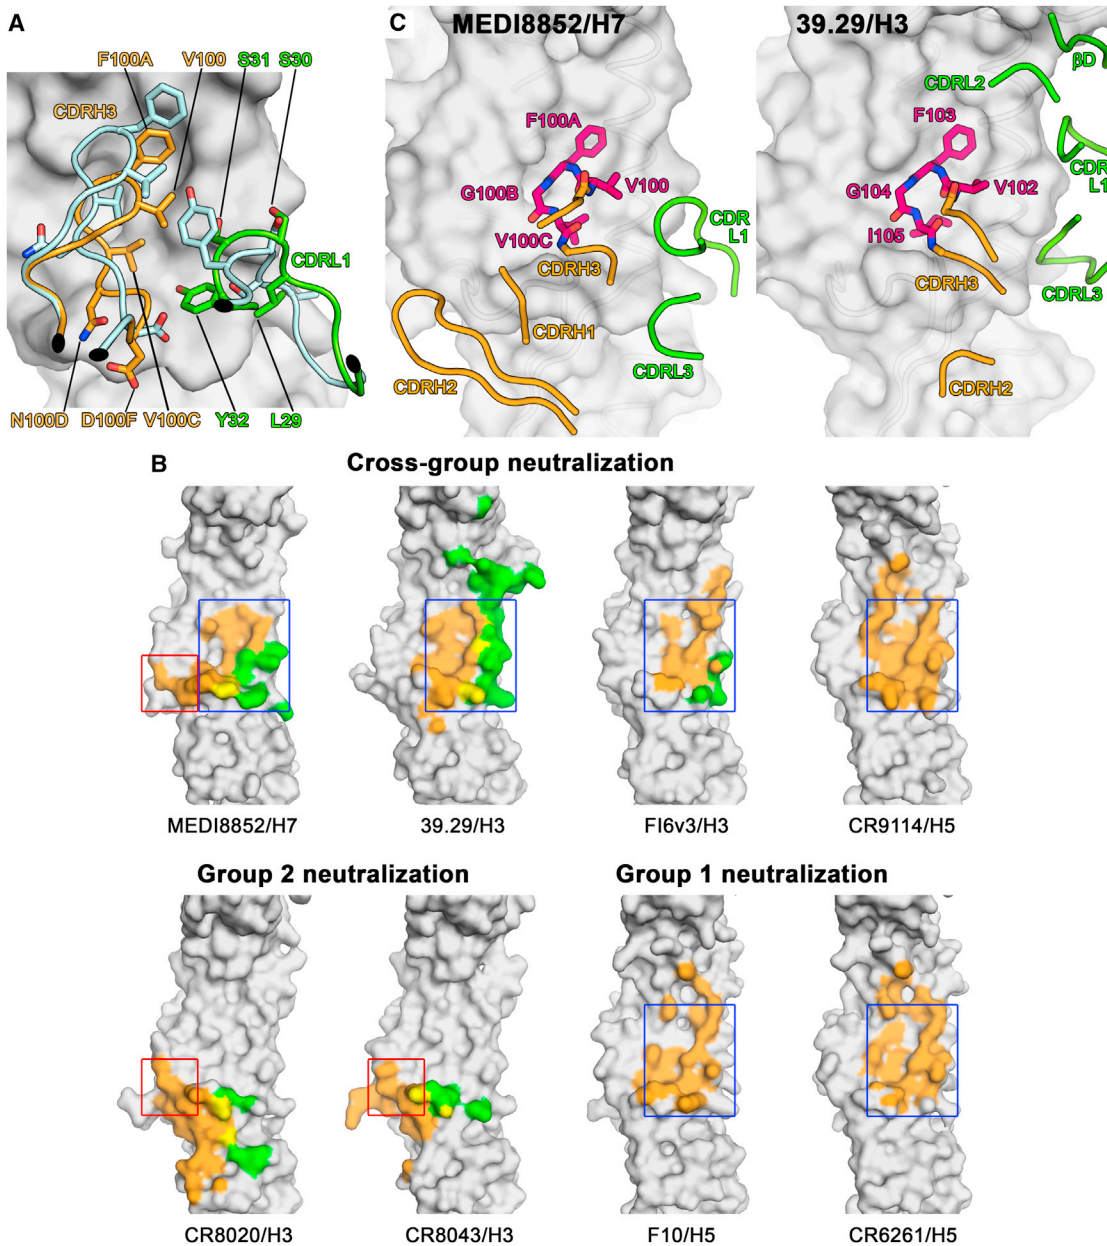

**Figure 7. MEDI8852 Binds to a Unique Site within the H5 and H7 HA Proteins through CDR-H3 and CDR-L1 Conformational Rearrangements upon Complex Formation**

(A) Conformational rearrangements in MEDI8852 on complex formation. Conformational change of the CDRH3 and CDR-L1 loops upon HA engagement. The apo structure of MEDI8852 is shown in blue, the bound structure is shown in orange and green for the heavy and light chains, respectively. The beginning and end of the moving regions are indicated with black ovals. HA (H7) is shown as a gray surface. The apo structure does not make interactions with HA and does not fit into its surface features—the conformational change is necessary for productive HA engagement.

(B) Epitopes of different broadly neutralizing antibodies on the HA surface. Residues of HA that are in contact with the heavy chain are colored orange, residues that are in contact with the light chain are colored green, and residues that are in contact with both chains are colored yellow. The blue box encases the part of the MEDI8852 epitope (helix A and hydrophobic groove) that can also be found in other broadly neutralizing antibodies as well as group 1 specific ones. The red box encases the part of the MEDI8852 epitope that can also be found in group 2 specific antibodies (middle of fusion peptide).

(C) Comparison of the structures of the conserved CDRH3 tetra-peptide in the complexes between MEDI8852 and H7 HA (left panel) and 39.29 and H3 HA (right panel). In both cases the tetra-peptide is shown in stick representation with other loops of the antibody shown as coil, colored as in panel A. The HAs are shown in surface representation.

See also [Figure S7](#).



orientations of the bound antibodies are very similar, and this structurally conserved ability to interact with both regions of HA presumably results in effective cross-reactivity.

The comparison of the structures of the complexes formed by MEDI8852 with H5 and H7 HAs with the previously reported complex formed between the cross-reactive monoclonal antibody 39.29 and H3 HA (Nakamura et al., 2013) indicated that the two antibodies had the amino acid sequences, V-F-G-V-MEDI8852 and V-F-G-I-39.29, in their HCDR3 loops that occupied equivalent positions in the complexes. Conceivably, the structure of this shared component of the antibodies might be used in the preparation of immunogens or to select candidate molecules on the basis of their affinity for the tetra-peptides. Of note, a recent paper described the development of a computationally designed protein binding to Helix A in the stem region of group 1 HAs that showed in vitro and in vivo antiviral efficacy (Koday et al., 2016).

The reconstruction of the developmental pathway of MEDI8852, as well as of F16, suggests that the generation of such broadly reactive antibodies may require a stepwise stimulation by group 1 HAs, followed by the selection of mutated variants by group 2 HAs. Indeed, the MEDI8852 donor was born in the 1950s and it is possible that this lineage was primed by H2N2 and further matured through multiple H3N2 exposures. This hypothesis is further strengthened by the observation that the UCA mAb neutralized with high potency the strain H2N2 JP/57 (i.e.,  $IC_{50} = 0.6 \mu\text{g/ml}$ ). The UCA and mutated antibodies of the MEDI8852 and F16 lineages represent useful tools to design stem-based immunogens that can be used in a heterologous prime-boost mode to prime the group 1 reactive naive B cells and selectively expand those that also cross-react with group 2 HAs.

Based on the results reported, MEDI8852 is currently being evaluated for safety and efficacy in adults with uncomplicated influenza infection in an outpatient setting (<https://clinicaltrials.gov/NCT02603952>) prior to conducting studies in patients hospitalized with influenza caused by type A strains.

## EXPERIMENTAL PROCEDURES

### Monoclonal Antibody Isolation and Ex Vivo Affinity Maturation

Monoclonal antibodies were isolated from memory B cells, as previously described (Pappas et al., 2014; Traggiai et al., 2004) from blood donors who had given written informed consent, following approval by the Cantonal Ethical Committee of Cantone Ticino, Switzerland. FY1 antibody was further modified to revert the non-germline framework amino acid changes and its affinity was improved through parsimonious mutagenesis of CDRs (Supplemental Experimental Procedures).

### Recombinant HA Protein and Binding Assays

Recombinant HA proteins were expressed and purified as previously described (Benjamin et al., 2014). The binding of antibodies to HAs was measured by ELISA or by staining HA transfected cells using flow cytometry (Supplemental Experimental Procedures).

### Viruses and Microneutralization Assay

Wild-type influenza strains and cold-adapted (ca) live-attenuated influenza vaccine viruses (complete viral strain designations shown in Table S1) were propagated in embryonated chicken eggs, titered, and used to infect MDCK cells to determine neutralizing activity as described in the Supplemental Experimental Procedures.

### In Vitro Fusion and HA Cleavage Assays

Antibody-mediated fusion inhibition was tested using a low pH-induced red blood cell fusion model adapted from protocol described in Wang et al. (2010). The ability of MEDI8852 to inhibit the low pH-activated conformational change in trypsin-digested H5 HA was analyzed by SDS/PAGE. The ability of antibody to block the HA0 cleavage by TPCK-treated trypsin was measured by western blot analysis (Supplemental Experimental Procedures).

### Measurement of Fc-Effector Function

ADCC activity was measured with the LDH release assay using primary human NK cells as effector cells and H1N1 or H3N2 influenza virus infected A549 cells as a target. ADCP activity was measured by flow cytometry using fluorescently labeled monocyte-derived macrophages and H1 or H3 HA-expressing MDCK as target cells. CDC activity was measured with the LDH release assay using rabbit complement on influenza H1N1-infected MDCK cells (Supplemental Experimental Procedures).

### Therapeutic Efficacy Studies in Mice and Ferrets

All animal studies were approved and conducted in accordance with MedImmune's Institutional Animal Care and Use Committee (murine studies) and Southern Research Institute's Institutional Animal Care and Use Committee (ferret studies) and performed in Association for the Assessment and Accreditation of Laboratory Animal Care (AAALAC)-certified facilities.

MEDI8852 or R347 control mAb was administered as a single intraperitoneal (i.p.) dose at various days post infection, depending on the virus strain. For oseltamivir comparison studies, mice were administered 25 mg/kg oseltamivir by mouth (PO) b.i.d. for 5 days, or a single 10 mg/kg dose i.v. of MEDI8852 with vehicle PO b.i.d. for 5 days. Viral loads in the lungs were measured by TCID<sub>50</sub> assay on day 5 post infection. Five- to six-month-old ferrets were challenged intranasally with A/Vietnam/1203/04 (H5N1) virus and treated with a single 25 mg/kg i.v. dose of MEDI8852 (or R347 control) or oseltamivir at 25 mg/kg BID for 5 days initiated at different days post infection. Bio-metric data systems chip was used for temperature monitoring. (Supplemental Experimental Procedures).

### HA-MEDI8852 Complex Preparation, Crystallization, and Structure Determination

H5 and H7 HAs were purified from the virus membrane and mixed with purified MEDI8852 antibody Fab fragments and incubated overnight at 4°C for complex formation. Complexes were further purified by size-exclusion chromatography and concentrated for crystallization. Crystals were frozen by direct immersion in liquid nitrogen and diffraction datasets were collected at 100 K at the IO2 and IO4 beamlines at the diamond light source (Harwell). Structures were solved by molecular replacement and refined using standard protocols. Macromolecular structures have been deposited under the accession numbers PDB: 5JW5 (apo MEDI8852), PDB: 5JW4 (H5 complex), and PDB: 5JW3 (H7 complex). Crystallographic statistics are summarized in Table S4 (Supplemental Experimental Procedures).

### ACCESSION NUMBERS

The accession number for the coordinates and structure factors reported in this paper is PDB: 5JW5 (apo MEDI8852, 5JW4 (H5 complex), and 5JW3 (H7 complex). The accession number for the sequences for all of the antibodies reported in this paper is GenBank: KX398429-KX398468.

### SUPPLEMENTAL INFORMATION

Supplemental Information includes Supplemental Experimental Procedures, seven figures, and four tables and can be found with this article online at <http://dx.doi.org/10.1016/j.cell.2016.05.073>.

### AUTHOR CONTRIBUTIONS

B.F.-R. carried out PCR of immunoglobulin sequences from B cells. G.A. produced and purified antibodies. M.F. analyzed immunoglobulin genetic



elements, produced figures, and carried out bioinformatic analysis. D.P. and C.S. carried out donor's selection and screenings for the identification of cross-reactive antibodies. F.V. and A.F. carried out cloning HAS and testing antibodies for binding in cytofluorimetry. S.B. performed biochemical and cellular assays to test the fusion and HA maturation inhibiting activities of isolated antibodies. B.G. and A.D.M. carried out ADCP and CDC studies. F.S. wrote the paper. A.L. and D.C. directed the B cell isolation studies, analyzed data, and wrote the paper. J.M.M. and E.B. carried out *in vivo* studies. L.W.-R. carried out ADCP studies. F.J.P.-H. carried out the ELISA binding studies. N.L.K., Q.Z., L.W.-R., and F.J.P.-H. carried out the neutralization studies. A.Q.Y. lead the antibody optimization. J.A.S. edited the paper and provided supervision. N.L.K. and Q.Z. directed antibody optimization, *in vitro* and *in vivo* characterization, analyzed the data, and wrote the paper. P.J.C., U.N., P.A.W., M.K.V., R.W.O., S.R.M., S.J.G., and J.J.S. designed and performed structural research, contributed new reagents and analytical tools, analyzed data, and wrote the paper.

### CONFLICTS OF INTEREST

A.L. is the scientific founder of Humabs BioMed SA. A.L. holds shares in Humabs BioMed. B.G., A.D.M., G.A., F.V., and D.C. are employees of Humabs Biomed. This work was funded by MedImmune, LLC, a wholly owned subsidiary of AstraZeneca Pharmaceuticals. N.L.K., J.M.M., E.B., L.W.-R., F.J.P.-H., A.Q.Y., J.A.S., and Q.Z. were employed by MedImmune, LLC when work was executed and may currently hold AstraZeneca stock or stock options.

### ACKNOWLEDGMENTS

We thank Jose Martinez and the MedImmune Laboratory Animal Resource staff for *in vivo* study assistance; Robert Woods for additional affinity characterization; and Sandrina Phipps, Arnita Barnes, and Kannaki Senthil for generating HA reagents. This work was supported by the European Research Council (grant 670955 BROADImmune) and the Swiss National Science Foundation (grant 160279). A.L. is supported by the Helmut Horten Foundation. We thank the staff at the Diamond Light Source Synchrotron for assistance and beam-line access under Diamond Light Source Proposal 9826. This work was funded by the Francis Crick Institute, London. U.N. was also funded by a Marie Curie Actions Intra-European Fellowship (grant 629829).

Received: February 22, 2016

Revised: April 4, 2016

Accepted: May 25, 2016

Published: July 21, 2016

### REFERENCES

- Benjamin, E., Wang, W., McAuliffe, J.M., Palmer-Hill, F.J., Kallewaard, N.L., Chen, Z., Suzich, J.A., Blair, W.S., Jin, H., and Zhu, Q. (2014). A broadly neutralizing human monoclonal antibody directed against a novel conserved epitope on the influenza virus H3 hemagglutinin globular head. *J. Virol.* *88*, 6743–6750.
- Corti, D., and Lanzavecchia, A. (2013). Broadly neutralizing antiviral antibodies. *Annu. Rev. Immunol.* *31*, 705–742.
- Corti, D., Suguitan, A.L., Jr., Pinna, D., Silacci, C., Fernandez-Rodriguez, B.M., Vanzetta, F., Santos, C., Luke, C.J., Torres-Velez, F.J., Temperton, N.J., et al. (2010). Heterosubtypic neutralizing antibodies are produced by individuals immunized with a seasonal influenza vaccine. *J. Clin. Invest.* *120*, 1663–1673.
- Corti, D., Voss, J., Gamblin, S.J., Codoni, G., Macagno, A., Jarrossay, D., Vachieri, S.G., Pinna, D., Minola, A., Vanzetta, F., et al. (2011). A neutralizing antibody selected from plasma cells that binds to group 1 and group 2 influenza A hemagglutinins. *Science* *333*, 850–856.
- DiLillo, D.J., Tan, G.S., Palese, P., and Ravetch, J.V. (2014). Broadly neutralizing hemagglutinin stalk-specific antibodies require FcγR interactions for protection against influenza virus *in vivo*. *Nat. Med.* *20*, 143–151.
- DiLillo, D.J., Palese, P., Wilson, P.C., and Ravetch, J.V. (2016). Broadly neutralizing anti-influenza antibodies require Fc receptor engagement for *in vivo* protection. *J. Clin. Invest.* *126*, 605–610.
- Dreyfus, C., Laursen, N.S., Kwaks, T., Zuijdgeest, D., Khayat, R., Ekiert, D.C., Lee, J.H., Metlagel, Z., Bujny, M.V., Jongeneelen, M., et al. (2012). Highly conserved protective epitopes on influenza B viruses. *Science* *337*, 1343–1348.
- Dunand, C.J.H., Leon, P.E., Kaur, K., Tan, G.S., Zheng, N.-Y., Andrews, S., Huang, M., Qu, X., Huang, Y., Salgado-Ferrer, M., et al. (2015). Preexisting human antibodies neutralize recently emerged H7N9 influenza strains. *J. Clin. Invest.* *125*, 1255–1268.
- Ekiert, D.C., Bhabha, G., Elsliger, M.-A., Friesen, R.H.E., Jongeneelen, M., Throsby, M., Goudsmit, J., and Wilson, I.A. (2009). Antibody recognition of a highly conserved influenza virus epitope. *Science* *324*, 246–251.
- Ekiert, D.C., Friesen, R.H.E., Bhabha, G., Kwaks, T., Jongeneelen, M., Yu, W., Ophorst, C., Cox, F., Korse, H.J.W.M., Brandenburg, B., et al. (2011). A highly conserved neutralizing epitope on group 2 influenza A viruses. *Science* *333*, 843–850.
- Floury, D., Barrère, B., Bizebard, T., Daniels, R.S., Skehel, J.J., and Knossow, M. (1999). A complex of influenza hemagglutinin with a neutralizing antibody that binds outside the virus receptor binding site. *Nat. Struct. Biol.* *6*, 530–534.
- Friesen, R.H.E., Lee, P.S., Stoop, E.J.M., Hoffman, R.M.B., Ekiert, D.C., Bhabha, G., Yu, W., Juraszek, J., Koudstaal, W., Jongeneelen, M., et al. (2014). A common solution to group 2 influenza virus neutralization. *Proc. Natl. Acad. Sci. USA* *111*, 445–450.
- Knossow, M., and Skehel, J.J. (2006). Variation and infectivity neutralization in influenza. *Immunology* *119*, 1–7.
- Koday, M.T., Nelson, J., Chevalier, A., Koday, M., Kalinoski, H., Stewart, L., Carter, L., Nieuwsma, T., Lee, P.S., Ward, A.B., et al. (2016). A Computationally Designed Hemagglutinin Stem-Binding Protein Provides *In Vivo* Protection from Influenza Independent of a Host Immune Response. *PLoS Pathog.* *12*, e1005409.
- Nakamura, G., Chai, N., Park, S., Chiang, N., Lin, Z., Chiu, H., Fong, R., Yan, D., Kim, J., Zhang, J., et al. (2013). An *in vivo* human-plasmablast enrichment technique allows rapid identification of therapeutic influenza A antibodies. *Cell Host Microbe* *14*, 93–103.
- Nobusawa, E., Aoyama, T., Kato, H., Suzuki, Y., Tateno, Y., and Nakajima, K. (1991). Comparison of complete amino acid sequences and receptor-binding properties among 13 serotypes of hemagglutinins of influenza A viruses. *Virology* *182*, 475–485.
- Pappas, L., Foglierini, M., Piccoli, L., Kallewaard, N.L., Turrini, F., Silacci, C., Fernandez-Rodriguez, B., Agatic, G., Giacchetto-Sasselli, I., Pellicciotta, G., et al. (2014). Rapid development of broadly influenza neutralizing antibodies through redundant mutations. *Nature* *516*, 418–422.
- Russell, R.J., Gamblin, S.J., Haire, L.F., Stevens, D.J., Xiao, B., Ha, Y., and Skehel, J.J. (2004). H1 and H7 influenza haemagglutinin structures extend a structural classification of haemagglutinin subtypes. *Virology* *325*, 287–296.
- Russell, C.A., Jones, T.C., Barr, I.G., Cox, N.J., Garten, R.J., Gregory, V., Gust, I.D., Hampson, A.W., Hay, A.J., Hurt, A.C., et al. (2008). The global circulation of seasonal influenza A (H3N2) viruses. *Science* *320*, 340–346.
- Schmidt, A.G., Xu, H., Khan, A.R., O'Donnell, T., Khurana, S., King, L.R., Manischewitz, J., Golding, H., Suphaphiphat, P., Carfi, A., et al. (2013). Preconfiguration of the antigen-binding site during affinity maturation of a broadly neutralizing influenza virus antibody. *Proc. Natl. Acad. Sci. USA* *110*, 264–269.
- Skehel, J.J., and Wiley, D.C. (2000). Receptor binding and membrane fusion in virus entry: the influenza hemagglutinin. *Annu. Rev. Biochem.* *69*, 531–569.
- Sui, J., Hwang, W.C., Perez, S., Wei, G., Aird, D., Chen, L.-M., Santelli, E., Stec, B., Cadwell, G., Ali, M., et al. (2009). Structural and functional bases for broad-spectrum neutralization of avian and human influenza A viruses. *Nat. Struct. Mol. Biol.* *16*, 265–273.
- Tan, G.S., Lee, P.S., Hoffman, R.M.B., Mazel-Sanchez, B., Krammer, F., Leon, P.E., Ward, A.B., Wilson, I.A., and Palese, P. (2014). Characterization of a

- broadly neutralizing monoclonal antibody that targets the fusion domain of group 2 influenza A virus hemagglutinin. *J. Virol.* *88*, 13580–13592.
- Throsby, M., van den Brink, E., Jongeneelen, M., Poon, L.L.M., Alard, P., Cornelissen, L., Bakker, A., Cox, F., van Deventer, E., Guan, Y., et al. (2008). Heterosubtypic neutralizing monoclonal antibodies cross-protective against H5N1 and H1N1 recovered from human IgM+ memory B cells. *PLoS ONE* *3*, e3942.
- Tong, S., Li, Y., Rivailler, P., Conrardy, C., Castillo, D.A.A., Chen, L.-M., Recuenco, S., Ellison, J.A., Davis, C.T., York, I.A., et al. (2012). A distinct lineage of influenza A virus from bats. *Proc. Natl. Acad. Sci. USA* *109*, 4269–4274.
- Tong, S., Zhu, X., Li, Y., Shi, M., Zhang, J., Bourgeois, M., Yang, H., Chen, X., Recuenco, S., Gomez, J., et al. (2013). New world bats harbor diverse influenza A viruses. *PLoS Pathog.* *9*, e1003657.
- Traggiai, E., Becker, S., Subbarao, K., Kolesnikova, L., Uematsu, Y., Gismondo, M.R., Murphy, B.R., Rappuoli, R., and Lanzavecchia, A. (2004). An efficient method to make human monoclonal antibodies from memory B cells: potent neutralization of SARS coronavirus. *Nat. Med.* *10*, 871–875.
- Wang, T.T., Tan, G.S., Hai, R., Pica, N., Petersen, E., Moran, T.M., and Palese, P. (2010). Broadly protective monoclonal antibodies against H3 influenza viruses following sequential immunization with different hemagglutinins. *PLoS Pathog.* *6*, e1000796.
- Wrammert, J., Koutsonanos, D., Li, G.-M., Edupuganti, S., Sui, J., Morrissey, M., McCausland, M., Skountzou, I., Hornig, M., Lipkin, W.I., et al. (2011). Broadly cross-reactive antibodies dominate the human B cell response against 2009 pandemic H1N1 influenza virus infection. *J. Exp. Med.* *208*, 181–193.
- Wright, P., Neumann, G., and Kawaoka, Y. (2007). Orthomyxoviruses (*Fields Virology*).
- Wu, Y., Cho, M., Shore, D., Song, M., Choi, J., Jiang, T., Deng, Y.-Q., Bourgeois, M., Almi, L., Yang, H., et al. (2015). A potent broad-spectrum protective human monoclonal antibody crosslinking two haemagglutinin monomers of influenza A virus. *Nat. Commun.* *6*, 7708.
- Xiong, X., Corti, D., Liu, J., Pinna, D., Foglierini, M., Calder, L.J., Martin, S.R., Lin, Y.P., Walker, P.A., Collins, P.J., et al. (2015). Structures of complexes formed by H5 influenza hemagglutinin with a potent broadly neutralizing human monoclonal antibody. *Proc. Natl. Acad. Sci. USA* *112*, 9430–9435.
- Yewdell, J.W. (2013). To dream the impossible dream: universal influenza vaccination. *Curr. Opin. Virol.* *3*, 316–321.

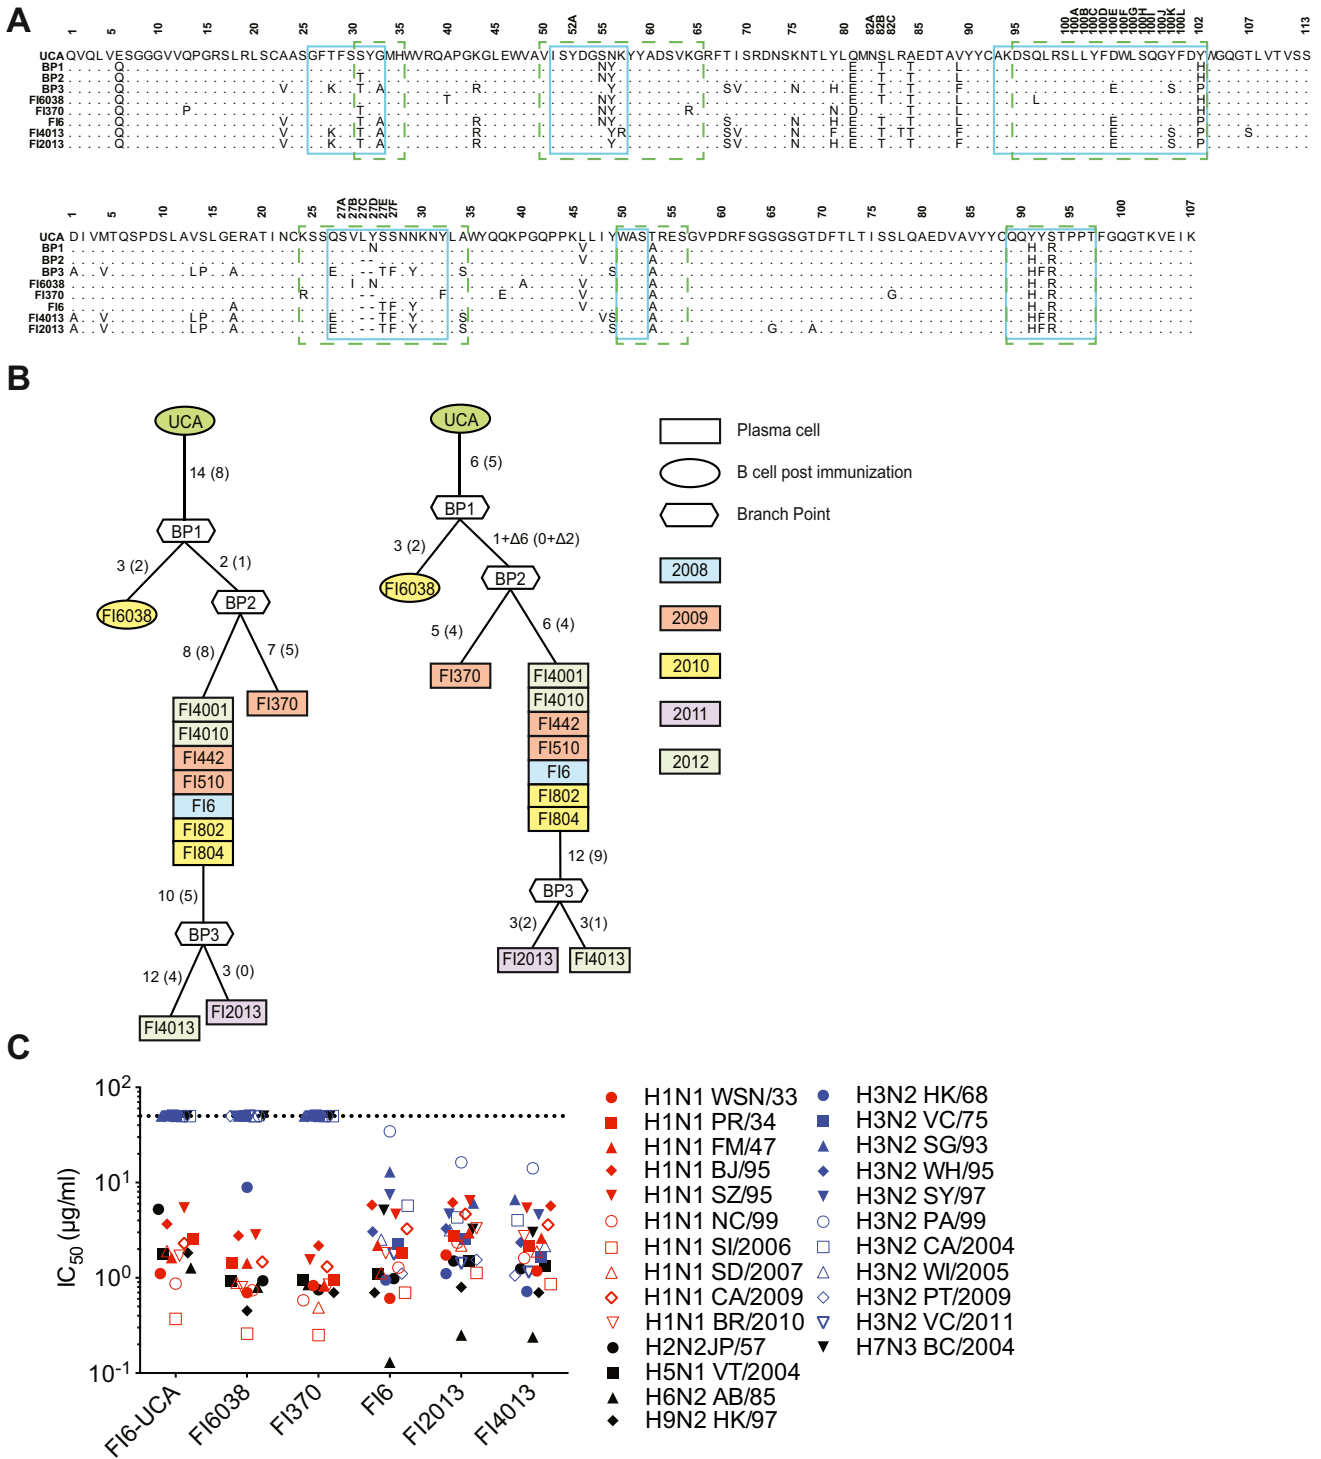

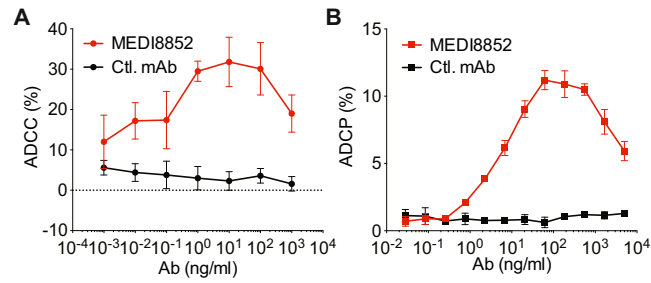

**Figure S2. MEDI8852 Fc-Effector Function Activity against H3N3 Viruses, Related to Figure 3**

(A) ADCC activity on A549 cells infected with with A/Honk Kong/8/68 (H3N2) and incubated with MEDI8852 (red solid dot) or an irrelevant control, MPE8v3 (black solid dot) antibody in the presence of human NK cells, antibody dependent killing was measured in quadruplicate by LDH release.

(B) ADCP activity on MDCK cells expressing H3 from A/Hong Kong/8/68 that were labeled with CFSE and incubated with MEDI8852 (red solid square), or an irrelevant control, R347 (black solid square) antibody in the presence of violet labeled human macrophages in duplicate. Percent phagocytosis was determined by the amount of total macrophages that were labeled with violet and CFSE. Error bars represent two times the standard deviation at each antibody concentration.



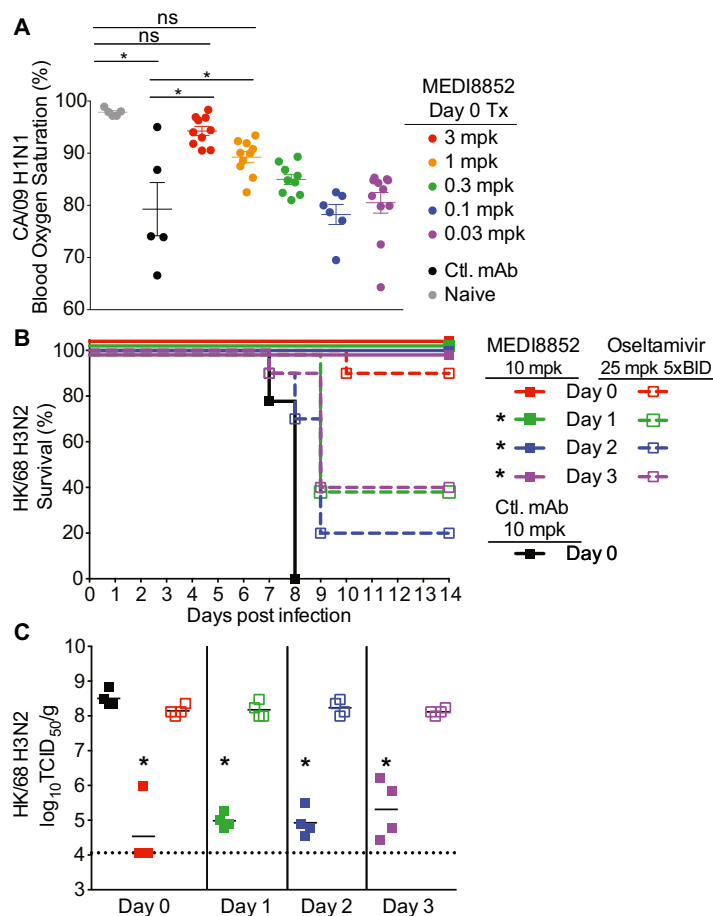

**Figure S3. MEDI8852 Provides Dose-Dependent Protection from Lethal Influenza Infection in Mice Even When Treatment Was Delayed, Related to Figure 4**

(A) Lung function was measured by pulse oximetry on Day 6 post-infection with CA/09 H1 in mice treated with mice were treated with a single IP dose of MEDI8852 at 3, 1, 0.3, 0.1, and 0.03 mg/kg, 3 mg/kg irrelevant control antibody, or non-treated non-infected animals (naive). Error bars represent two times the standard error of the mean at each antibody concentration. \* $p < 0.05$  significance determined by ANOVA with multiple comparison's test.

(B) Kaplan-Meier survival curves.

(C) Lung viral titers on Day 5 post infection determined by TCID<sub>50</sub> assay after mice were infected with rHK/68 H3 virus on study Day 0, then treatment with MEDI8852 at 10 mg/kg (closed symbols with solid line), Oseltamivir at 25 mg/kg BID for 5 days (open symbol with dashed line, or irrelevant control antibody, R347 (black solid) was initiated at the indicated Day post infection. Error bars represent the standard error of the mean for each determination. \*, For survival studies  $p < 0.005$  significance compared to control antibody treatment by Log-Rank test; for lung titers,  $p < 0.05$  significance compared to control antibody treatment by student's t test.

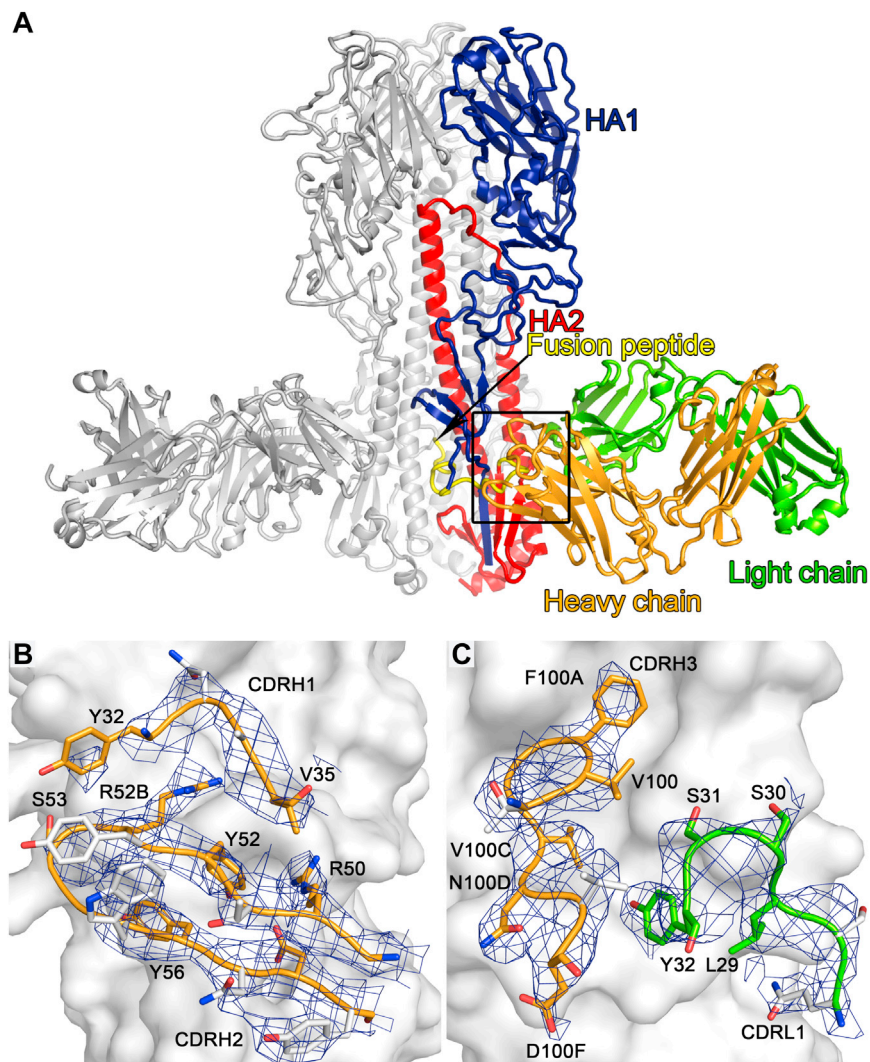

**Figure S4. Overview of MEDI8852 in Complex with H7 Haemagglutinin and Unbiased Electron Density Maps, Related to Figure 5**

(A) One H7 HA monomer and the cognate MEDI8852 Fab fragment are highlighted in color, the other two copies in the trimer are colored gray. The HA1 polypeptide is colored blue, the HA2 polypeptide is colored red, with the fusion peptide at the N terminus of HA2 highlighted in yellow. The heavy chain of the MEDI8852 Fab is colored orange, the light chain is colored green.

(B and C) The MEDI8852 CDR loops H1 and H2 (B) and H3 and L1 (C) are shown in complex with H5 HA. All six instances of the variable domain of the heavy or light chains were omitted from the model after rigid-body refinement and omit maps were calculated. Figures of merit were determined in Sigmaa and six-fold NCS averaging was performed in DM. The maps were sharpened by a negative B-factor of  $75 \text{ \AA}^2$ . The resulting maps are shown at a  $\sigma$  level of 1.0 within  $2.0 \text{ \AA}$  distance of MEDI8852 atoms. H5 HA is shown in surface representation and colored gray, MEDI8852 is shown in cartoon and stick representation and colored orange for the heavy chain and green for the light chain. MEDI8852 side chains that are not in contact with HA are colored gray.

|          |     | HA1   | HA2 |     |         |       |            |       |         |     |       |       |       |       |       |
|----------|-----|-------|-----|-----|---------|-------|------------|-------|---------|-----|-------|-------|-------|-------|-------|
|          |     | FP    |     |     |         |       | Trp21-loop |       | helix A |     |       |       |       |       |       |
|          |     | 8     | 15  | 16  | 18      | 19    | 20         | 21    | 38      | 42  | 45    | 48    | 49    | 52    |       |
| Group 1  | H1  | H     | T   | G   | V/I     | D     | G          | W     | L/Q/R   | Q   | I     | I     | T/S   | V     |       |
|          | H5  | -     | Q   | -   | V/I     | -     | -          | -     | K       | -   | I/V   | I/V   | -     | -     |       |
|          | H2  | -     | Q   | -   | V/I     | -     | -          | -     | K       | -   | I/F/V | -     | -     | V/I   |       |
|          | H6  | -     | -   | -   | I/V     | -     | -          | -     | R/K     | -   | I/V   | -     | -     | -     |       |
|          | H8  | Q     | S   | -   | I       | -     | -          | -     | Q       | -   | -     | -     | T/S   | V/I   |       |
|          | H9  | Q     | S/P | -   | -       | A     | -          | -     | R/K     | -   | I/V   | -     | -     | -     |       |
|          | H11 | L     | P   | -   | I       | N     | -          | -     | K/R     | -   | I/V   | -     | -     | -     |       |
|          | H12 | Q     | P   | -   | -       | A     | -          | -     | R       | -   | I     | M/I   | Q     | L     |       |
|          | H13 | L     | P   | -   | I       | N     | -          | -     | K       | -   | -     | -     | -     | I     |       |
|          | H16 | L     | P   | -   | I       | N     | -          | -     | K       | -   | -     | -     | -     | I     |       |
| H17      | Q   | Q     | -   | I   | -       | -     | -          | K     | -       | V   | -     | -     | -     |       |       |
| H18      | -   | Q     | -   | I   | -       | -     | -          | K     | -       | V   | -     | -     | -     |       |       |
| Group 2  | H3  | -     | E   | -   | V/I/M/K | -     | -          | -     | -       | -   | -     | -     | N/T   | L     |       |
|          | H4  | -     | Q   | -   | I       | -     | -          | -     | -       | -   | -     | -     | N     | L     |       |
|          | H7  | -     | E   | -   | I/V     | -     | -          | -     | Y       | -   | -     | -     | -     | L     |       |
|          | H10 | -     | E   | -   | V/I     | -     | -          | -     | Y       | -   | I/V   | -     | -     | L     |       |
|          | H14 | -     | Q   | -   | I       | -     | -          | -     | -       | -   | -     | -     | N     | L     |       |
|          | H15 | -     | E   | -   | I       | -     | -          | -     | Y       | -   | -     | -     | -     | L     |       |
| MEDI8852 |     | V100C |     |     |         | V100C | V100C      | V100C | F100A   | Y32 | S30   | F100A | F100A | F100A | F100A |
|          |     |       |     |     | N100D   | Y32   |            |       |         | L29 | S31   |       |       |       |       |
|          |     |       | Y52 | Y52 | Y52     |       |            |       |         |     | Y32   |       |       |       |       |
|          |     |       |     |     | R52B    | R50   |            |       |         |     |       |       |       |       |       |

**Figure S5. Sequence Comparison of MEDI8852 Epitope among 18 HA Subtypes and Corresponding Contact Residues in the MEDI8852 Paratope, Related to Figures 5 and 6**

The occurrence of amino acid identities was analyzed at different HA residues among each HA subtype, only amino acids with a frequency higher than 1% are shown. In total, 12'472 H1, 404 H2, 12'263 H3, 1'005 H4, 694 H5, 1'152 H6, 119 H7, 119 H8, 1'838 H9, 590 H10, 487 H11, 153 H12, 67 H13, 16 H14, 10 H15, 7 H16, 2 H17 and 1 H18 isolates were analyzed, respectively.

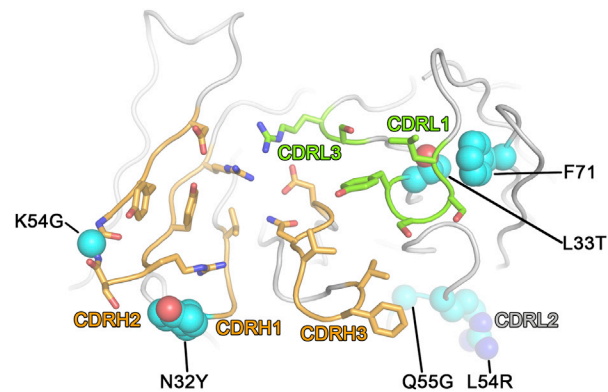

**Figure S6. Mutations Associated with Maturation of FY1 to MEDI8852, Related to Figure 6**

Heavy chain: Y32 (MEDI8852) instead of N32 (parental): The Y32 sidechain is within hydrogen bonding distance with HA and makes a stabilizing  $\pi$  stacking interaction with R52B, which is in direct contact with V18 in the fusion peptide of HA. G54 (MEDI8852) instead of K54 (parental): This amino acid is located in the middle of the CDRH2 loop in an unusual turn between the two beta strands of CDRH2. The backbone at G54 adopts a conformation that is only possible with a glycine sidechain. The parental K54 would lead to a different backbone conformation. Light chain: T33 (MEDI8852) instead of L33 (parental): This residue is next to CDRL1 and especially Y32, which undergo a conformational change upon binding. The T33 sidechain stacks against the sidechain of F71 in unbound and bound conformations, anchoring the entire CDRL1 region during the conformational change. The leucine in the parental antibody could make a similar stacking interaction, but would anchor CDRL1 in a different conformation due to the additional methyl group of the leucine. R54 and G55 instead of L54 and Q55 (parental): R54 and G55 are in CDRL2 and connected with CDRL1 through backbone hydrogen bonds. The sidechain of Q55 in the parental antibody would sterically clash with L46 and completely alter the backbone and sidechain conformation the LCDR1 and LCDR2 loops. G55 has no sidechain and thus does not clash. Therefore, R54 and G55 enable and stabilize the backbone conformation observed in the complex, which might form a stable platform for the conformational change in CDRL1 necessary for binding.



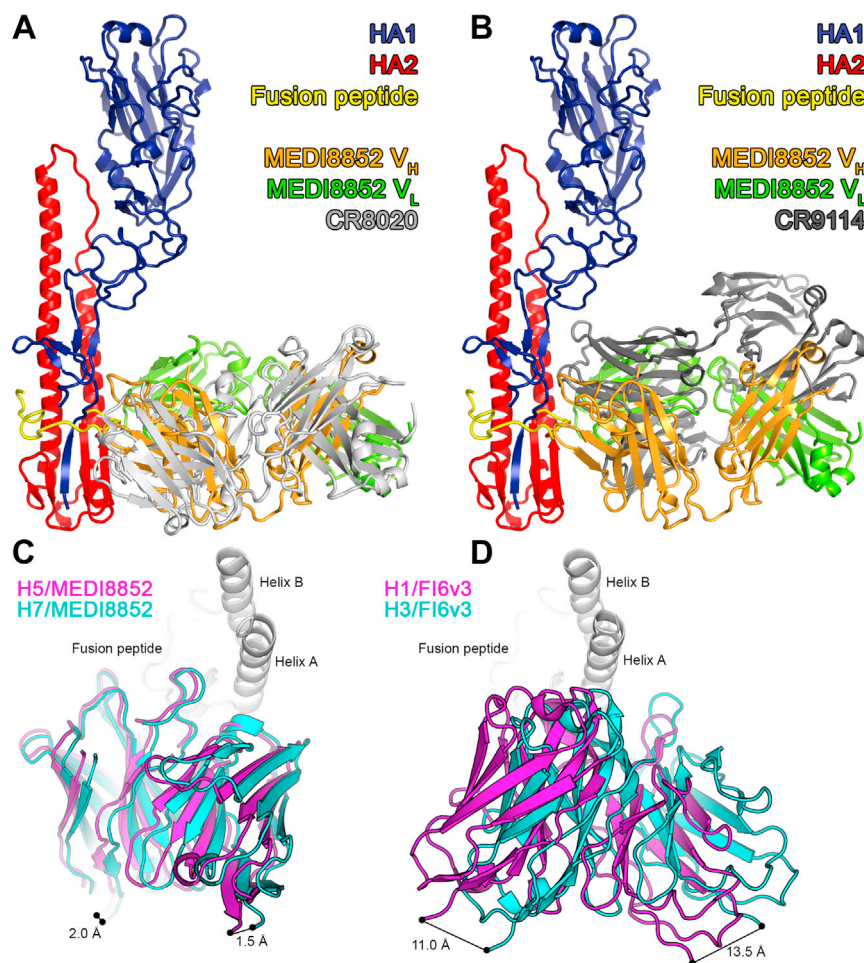

**Figure S7. Comparison between MEDI8852, CR8020, CR9114, and F16, Related to Figure 7**

(A and B) Antibody-HA complex structures were overlaid by aligning their HA2 polypeptides. For clarity, only the HA of the MEDI8852/H5 complex is shown. All proteins are shown in cartoon representation, with HA1 colored blue, HA2 colored red and the fusion peptide colored yellow. The CR8020 (A) and CR9114 (B) Fab fragments are colored light and dark gray, respectively, and the MEDI8852 Fab fragment is colored orange (heavy chain) and green (light chain).

(C and D) The antibodies are shown in cartoon representation with group 1 bound antibody colored in magenta and group 2 colored in cyan from the N terminus of the heavy chain to the C terminus of the light chain. Helix A and helix B of HA2 are shown in cartoon representation. F16v3 is rotated between group 1 and group 2 leading to a 11-13.5 Å distance between the ends of the variable domains. By contrast, for MEDI8852, there is a much smaller rotation of about 1 degree and only 2-1.5 Å displacement between the ends of the variable domains in the complexes with H5 HA (group 1) and H7 HA (group 2).

## **Supplemental Information**

### **Structure and Function Analysis of an Antibody**

#### **Recognizing All Influenza A Subtypes**

**Nicole L. Kallewaard, Davide Corti, Patrick J. Collins, Ursula Neu, Josephine M. McAuliffe, Ebony Benjamin, Leslie Wachter-Rosati, Frances J. Palmer-Hill, Andy Q. Yuan, Philip A. Walker, Matthias K. Vorlaender, Siro Bianchi, Barbara Guarino, Anna De Marco, Fabrizia Vanzetta, Gloria Agatic, Mathilde Foglierini, Debora Pinna, Blanca Fernandez-Rodriguez, Alexander Fruehwirth, Chiara Silacci, Roksana W. Ogrodowicz, Stephen R. Martin, Federica Sallusto, JoAnn A. Suzich, Antonio Lanzavecchia, Qing Zhu, Steven J. Gamblin, and John J. Skehel**

## Supplemental Information

### Structure and function analysis of an antibody recognizing all influenza A subtypes

Nicole L. Kallewaard<sup>1\*</sup>, Davide Corti<sup>2\*</sup>, Patrick J. Collins<sup>3\*</sup>, Ursula Neu<sup>3\*</sup>, Josephine M. McAuliffe<sup>1</sup>, Ebony Benjamin<sup>1</sup>, Leslie Wachter-Rosati<sup>1</sup>, Frances J. Palmer-Hill<sup>1</sup>, Andy Q. Yuan<sup>4</sup>, Philip A. Walker<sup>5</sup>, Matthias K. Vorlaender<sup>3</sup>, Siro Bianchi<sup>2</sup>, Barbara Guarino<sup>2</sup>, Anna De Marco<sup>2</sup>, Fabrizia Vanzetta<sup>2</sup>, Gloria Agatic<sup>2</sup>, Mathilde Foglierini<sup>6</sup>, Debora Pinna<sup>6</sup>, Blanca Fernandez-Rodriguez<sup>6</sup>, Alexander Fruehwirth<sup>6</sup>, Chiara Silacci<sup>6</sup>, Roksana W. Ogrodowicz<sup>5</sup>, Stephen R. Martin<sup>5</sup>, Federica Sallusto<sup>6</sup>, JoAnn A. Suzich<sup>1</sup>, Antonio Lanzavecchia<sup>6,7†</sup>, Qing Zhu<sup>1†</sup>, Steven J. Gamblin<sup>3†</sup> and John J. Skehel<sup>3†</sup>

<sup>1</sup>Department of Infectious Disease and Vaccines, MedImmune LLC, One MedImmune Way, Gaithersburg, MD 20878, USA

<sup>2</sup>Humabs BioMed SA, Via Mirasole 1, 6500, Bellinzona Switzerland

<sup>3</sup>Mill Hill Laboratory, The Francis Crick Institute, London NW7 1AA, United Kingdom

<sup>4</sup>Department of Antibody Discovery and Protein Engineering, MedImmune LLC, One MedImmune Way, Gaithersburg, MD 20878, USA

<sup>5</sup>Structural Biology Science Technology Platform, Mill Hill Laboratory, Francis Crick Institute, London NW7 1AA, United Kingdom

<sup>6</sup>Institute for Research in Biomedicine, Università della Svizzera italiana, 6500 Bellinzona, Switzerland

<sup>7</sup>Institute for Microbiology, ETH Zurich, Wolfgang-Pauli-Strasse 10, 8093 Zurich, Switzerland

\*These authors contributed equally.

†Correspondence should be addressed to: E-mail: [zhuq@MedImmune.com](mailto:zhuq@MedImmune.com) (QZ), [lanzavecchia@irb.usi.ch](mailto:lanzavecchia@irb.usi.ch) (AL), [steve.gamblin@crick.ac.uk](mailto:steve.gamblin@crick.ac.uk) (SJG), and [John.Skehel@crick.ac.uk](mailto:John.Skehel@crick.ac.uk) (JJS)

## SUPPLEMENTAL EXPERIMENTAL PROCEDURES:

### **Monoclonal antibody isolation, and ex vivo affinity maturation**

Monoclonal antibody isolation was performed as previously described (Pappas et al., 2014; Traggiari et al., 2004). In brief, peripheral blood mononuclear cell (PBMC) samples were obtained from a single healthy donor after vaccination following written consent. Memory B cells were isolated from cryopreserved or fresh PBMCs using CD22 microbeads or anti-FITC (fluorescein isothiocyanate) microbeads (Miltenyi Biotec) after staining of PBMCs with CD22-FITC, and were immortalized with Epstein–Barr virus (EBV) and CpG in multiple wells. Supernatants of immortalized B cell clones containing monoclonal antibodies were screened for binding to HA proteins representing two different HA subtypes. Using this methodology, we identified a monoclonal from primary screening in ELISA assay that showed cross-reactive binding to recombinant HA proteins of A/Vietnam/2005 H5N1 and A/Netherlands/2003 H7N7. Variable gene sequences were isolated from this cross-reactive clone by RT-PCR, cloned and expressed as a full-length IgG transiently in 293 T cells. The lead FY1 antibody was further modified to revert the non-germline framework amino acid changes and affinity optimize the CDRs. For the affinity optimization, full-length IgG constructs containing the different variants created by CDR based parsimonious mutagenesis were expressed transiently in 293 T cells and supernatants were screened by ELISA to select clones that resulted in increased binding activity to H3 while maintaining or increasing the binding activity to H1 HA proteins. Coating concentrations of 0.15 µg/ml of rabbit anti-human IgG were used to capture and normalize variant IgG constructs from supernatants, and binding was probed using 0.5 µg/ml of biotinylated HA proteins A/Perth/2009 H3N2 and A/California/7/2009 H1N1 followed by the addition of streptavidin-HRP (1:5000). Beneficial single mutations were combined and cloned into a combinatorial library, which were expressed and screened by ELISA as described above, leading to the generation of MEDI8852.

### **Immunoglobulin lineage and sequence analysis**

The DNA Maximum Likelihood program (Dnaml) of the PHYLIP package, version 3.69, was used to estimate immunoglobulin phylogenies from nucleotide sequences that were first aligned using ClustalW2, as previously described<sup>12</sup>. IgHCDR3 regions were defined with their Kabat numbering using the software available on the Abnum website (<http://www.bioinf.org.uk/abs/abnum/>). The V, D and J genes of the IgH DNA sequences were identified using the IMGT database as a reference (Brochet et al., 2008; Ye et al., 2013). The UCA sequences were inferred with Antigen Receptor Probabilistic Parser (ARPP) UA Inference software (Kepler, 2013), and produced by gene synthesis (Genscript). Branchpoint antibodies were determined by the antibody phylogenetic tree derived by dnaml, and produced by gene synthesis (Genscript).

### **Recombinant HA protein and binding assays**

Recombinant HA proteins were expressed and purified as previously described (Benjamin et al., 2014) ELISA binding assays were performed using 384 well plates (Maxisorp, Nunc) with 0.5 µg/ml of purified HA protein as described in **Table S2**. ELISA plates were washed, blocked 1% (w/v) casein (Thermo Scientific), and serially diluted antibodies were incubated for 1 hr at room temperature. Bound antibodies were detected using a peroxidase-conjugated mouse anti-human IgG antibody (KPL 1:10,000), followed by development with TMB solution (KPL). The absorbance at 450nm was measured, and EC<sub>50</sub> values were calculated using a non-linear regression of log (inhibitor) vs response in Graph Pad Prism. Cell surface expressed protein binding assays were conducted using flow cytometry to detect binding of antibodies to HA transfected cells. HEK 293 cells were transiently transfected with full-length wild type HA expressing plasmids. Forty-eight hours after transfection, cells were detached with trypsin, and incubated with 5 µg/ml of FY1 or MEDI8852 on ice for 1 hour. Antibody remaining bound to surface expressed HA protein after washing was then stained with a goat anti-human IgG Daylight 649 (Jackson ImmunoResearch), and detected by flow cytometry.



### **FACS based binding to cell surface expressed HA proteins**

HA protein used as follows; subtype H1 (A/South Carolina/1/18 (H1N1)), subtype H4 (A/duck/Czechoslovakia/56 (H4N6)), subtype H8 (A/turkey/Ontario/6118/68 (H8N4)), subtype H10 (A/chicken/Germany/N49 (H10N7)), subtype H11 (A/duck/Memphis/546/74 (H11N9)), subtype H12 (A/duck/Alberta/60/76 (H12N5)), subtype H13 (A/gull/Maryland/704/77 (H13N6)), subtype H14 (A/mallard/Astrakhan/263/82 (H14N5)), subtype H15 (A/shearwater/West Australia/2576/79 (H15N9)), subtype H16 (A/black-headed gull/Sweden/2/99 (H16N3)), subtype H17 (A/little yellow-shouldered bat/Guatemala/164/2009 (H17N10)), and subtype H18 (A/flat-faced bat/Peru/033/2010 (H18N11)).

### **Viruses and microneutralization assay**

Wild-type influenza strains were obtained from the Centers for Disease Control and Prevention or purchased from the American Tissue Culture Collection. Cold adapted (ca) live-attenuated influenza vaccine viruses were generated by either classical reassortment or by reverse genetics (Jin et al., 2003). All viruses were propagated in embryonated chicken eggs, and virus titers were determined by mean 50% tissue culture infective dose (TCID<sub>50</sub>) per milliliter. Complete viral strain designations are shown in **Table S1**. The microneutralization assay was performed as described previously (Benjamin et al., 2014). Briefly, 60 TCID<sub>50</sub> of virus/well was added to three-fold serial dilutions of antibody in a 384-well plate in complete MEM medium containing 0.75ug/ml Trypsin (Worthington) in duplicate wells. After 1 hour incubation at 33°C 5% CO<sub>2</sub>, 2x10<sup>4</sup> MDCK cells/well were added to the plate. Plates were incubated at 33°C 5% CO<sub>2</sub> incubator for approximately 40 hr, and the NA activity was measured by adding a fluorescently-labeled substrate, methylumbelliferyl-N-acetyl neuraminic acid (MU-NANA) (Sigma) to each well and incubated at 37°C for 1 hr. Virus replication represented by NA activity was quantified by reading fluorescence using the following settings: excitation 355 nm, emission 460 nm; 10 flashes per well. The concentration of antibody required for a 50% reduction in viral replication (IC<sub>50</sub>) was calculated using a non-linear fit algorithm curve fit in Graph Pad Prism. If neutralization curve was not complete, then value was assigned the highest concentration of inhibitor tested.

### **In vitro fusion and HA cleavage assays**

Antibody mediated fusion inhibition was tested using a low pH induced red blood cell fusion model adapted from protocol described in (Wang et al., 2010). In brief, A/Puerto Rico/8/34 virus (10 x 10<sup>6</sup> TCID<sub>50</sub>) propagated in the presence of trypsin was incubated with human red blood cells (2% final red cell concentration) on ice for 10 minutes. Antibody dilutions were incubated with virus for 30 minutes at room temperature. Red blood cells were added to the virus-antibody mixture for 30 minutes at 37°C, then sodium acetate buffer (0.5 M pH 5.0) was added for additional 45 minutes at 37°C. Samples were centrifuged for 6 minutes at 400xg and incubated for additional 45 minutes at room temperature and then re-pelleted for 6 minutes at 400xg. Supernatants were transferred to an ELISA plate for determination of absorbance at 540 nm. To evaluate the ability of MEDI8852 to inhibit the low pH activated conformational change in HA, H5 HA (A/Vietnam/1194/2004 carrying substitution N186K) and H5-MEDI8852 Fab complex solutions (0.5 mg/ml) were incubated at various pH values (obtained by adding 0.15 M citrate buffer, pH 3.5), adjusted to neutral pH by using 1M Tris-HCl, pH 8.0, and digested with TPCK treated trypsin at a ratio of 20:1 (wt:wt) for 30 min at 37 °C. The digestion was stopped using an equal amount, to trypsin, of soybean trypsin inhibitor. Tryptic digestion products were analyzed by SDS/PAGE. To assess the ability of antibody to block the cleavage of HA protein, baculovirus expressed recombinant HA from A/New Caledonia/20/99 (H1N1) or A/Hong Kong/8/68 (H3N2) was incubated with antibody at molar ratio of 15:1 (mAb:HA) for 40 min. The antibody-HA mixture was then exposed to 2.5 µg/ml of TPCK-treated trypsin and further incubated for 5, 10, 20, and 40 minutes at 37°C. Samples were separated on a polyacrylamide gel and then transferred to a PVDF membrane for Western

blot analysis using a biotinylated human monoclonal antibody (FO32) (Humabs BioMed) that is specific for the HA2 and HA0 of influenza A strains.

### **Measurement of Fc-effector function**

ADCC assays were performed using primary human NK cells as effector cells isolated from the PBMCs of healthy donors and target cells of A/Puerto Rico/8/34 H1N1 or A/Hong Kong/8/68 H3N2 influenza virus infected A549 cells at a target to effector ratio of 6:1. Antibody dependent cell killing was measured using LDH release assay after 4 hours of incubation. For ADCP activity, human monocytes were isolated from PBMCs of healthy donors and incubated with M-CSF for 6-7 days to differentiate into macrophages. Macrophages fluorescently labeled violet were incubated with MDCK target cells stably expressing either H1 or H3 HA proteins from A/South Dakota/06/2007 H1N1 or A/Hong Kong/8/68 H3N2 and fluorescently labeled with CFSE at an effector to target ratio of 6:1. Antibody-mediated phagocytosis was determined after 2 hours incubation by flow cytometry, measuring the total macrophage percentage that contained target cells (i.e., the double positive violet and CFSE stained cells). CDC activity was measured using rabbit low-tox complement that had been pre-adsorbed to infected MDCK cells. Complement was mixed with influenza A/Puerto Rico/8/34 H1N1 infected MDCK cells, and MEDI8852 dependent cell killing was measured using LDH release assay after 2 hours of incubation.

### **Therapeutic efficacy studies in mice and ferrets**

All murine study protocols were approved and conducted in accordance with MedImmune's Institutional Animal Care and Use Committee and subsequently performed in an Association for the Assessment and Accreditation of Laboratory Animal Care (AAALAC)-certified facility. Six- to eight-week-old BALB/c mice (Harlan Laboratories) were used in these studies. Mice were weighed on the day of or 1 day before virus challenge and monitored daily for 14 days for weight loss and survival (mice with body weight loss of  $\geq 25\%$  were euthanized). For the study of prophylactic and therapeutic efficacy, mice were infected intranasal with 3 x MLD50 of CA/2009 ( $9.5 \times 10^4$  TCID50/mouse); 5x MLD50 of WSN/33 ( $6 \times 10^2$  TCID50/mouse); 7 x MLD50 of rHK/68 ( $3.6 \times 10^4$  TCID50/mouse) on Day 0. Animals administered a single IP dose of 10 mg/kg, 3 mg/kg, or 1 mg/kg of MEDI8852 on Day 0, Day 1, Day 2, Day 3, or Day 4 post-infection, depending on the virus strain. For oseltamivir comparison studies, mice were administered 25 mg/kg oseltamivir PO BID for 5 days, or a single dose of MEDI8852 10mg/kg IV with equivalent volume of vehicle given PO BID for 5 days to mimic the hydration of oseltamivir treated animals. To assess virus load in the lungs, four mice from each group were euthanized on Day 5 post-infection. Whole lungs were homogenized in 10% (wt/vol) sterile L15 medium (Invitrogen) and titrated on MDCK cells to determine the TCID<sub>50</sub>/gram of tissue. Lung function was measured using the MouseOx™ Pulse-oximeter infrared sensor collar clip (Starr Life Sciences, Oakmont PA) to determine the percent blood SpO<sub>2</sub> of mice on day 6 post infection. The ferret H5N1 study was completed under contract at Southern Research Institute (Birmingham, Alabama). Five-to-six months' old influenza sero-negative ferrets (Triple F Farms) were challenged intranasally with 1 LD90 of A/Vietnam/1203/04 (H5N1) highly pathogenic avian influenza virus in 1.0 ml (approximately 0.5 ml/nare). Infected animals were treated with either a single IV dose of MEDI8852 at 25 mg/kg, oseltamivir at 25 mg/kg BID for 5 days initiated at 1, 2, or 3 days post infection. Control-treated animals received a 25 mg/kg IV dose of isotype control monoclonal antibody on Day 1 post-infection. Bio-metric data systems chip was implanted between the shoulder blade for identification and temperature monitoring. Animals were monitored for weight loss, fever, clinical signs, and survival.

### **MEDI8852 Fab and complex crystallization.**

A/Vietnam/1194/2004 recombinant virus containing substitution Asn186Lys and H7 A/Turkey/Italy/214845/2002, Group 1 and Group 2 viruses respectively, Figure 2. The viruses were grown in hens eggs and purified by sucrose density gradient centrifugation, according to standard protocols (Skehel and Schild, 1971). H5 and H7 HAs were purified from the virus membrane by detergent extraction followed by trypsin digestion (H5) or bromelain digestion (H7). The digestion was then further purified by ion exchange chromatography using a Q FF Sepharose column and finally by gel filtration chromatography, on a superdex-200 16/60 column (GE) in 20mM Tris/HCl pH 8.0, 150 mM NaCl. The Fab fragments from MEDI8852 IgG were prepared by Endoproteinase Lys-C digestion. The Fab fragments were purified using Protein A sepharose affinity chromatography (HiTrap Protein A, 1 ml column) followed by gel filtration chromatography using a superdex-200 16/60 column (GE) in 20 mM Tris/HCl pH 8.0, 150 mM NaCl. Excess MEDI8852 Fab was added to purified H5 and H7 HA and incubated overnight at 4°C for complex formation in 20 mM Tris/HCl pH 8.0, 150 mM NaCl. The complex was then loaded onto a superdex-200 gel filtration column to purify the predicted 3Fab-HA complex from any excess Fab. Peak fractions corresponding to the Fab-HA complex were pooled and concentrated for crystallization. MEDI8852\_H5 complex crystals were obtained from 16% PEG 3350, 0.1 M Pipes pH 7.0, cryoprotected with 25% ethylene glycol prior to freezing. MEDI8852\_H7 complex crystals were obtained from 45% pentaerythritol propoxylate (PEP) 15/4, 0.1 M Tris, pH 8.5. MEDI8852 Fab crystals were obtained from 20% PEG 3350, 0.2 M Ammonium Dihydrogen Phosphate after seeding with crystals obtained from 18% PEG8000, 0.1 M Sodium Cacodylate pH 6.5 and 0.2 M Calcium Acetate Hydrate. Crystals were cryoprotected with 25% ethylene glycol prior to freezing.

### **Structure determination**

Crystals were frozen by direct immersion in liquid nitrogen and diffraction datasets were collected at 100K at the IO2 and IO4 beamlines at the diamond light source (Harwell, UK). Diffraction datasets were indexed and integrated with XDS (Kabsch, 2010) and scaled with XSCALE. For solving the MEDI8852 Fab fragment, a search model was generated by blasting the sequences of its heavy and light chains and using the structures with the highest sequence homology. The search models were generated in chainsaw from CCP4 (Collaborative Computational Project, Number 4, 1994). Molecular replacement was carried out with Phaser (McCoy et al., 2007), which found two constant domains and two variable domains corresponding to two Fab fragments. The structure was refined by rigid body and simulated annealing refinement in Phenix (Adams et al., 2010), then completely rebuilt into the electron density, and then refined by alternating cycles of model building in Coot (Emsley and Cowtan, 2004) and TLS, restrained coordinate and B factor refinement in Refmac (Murshudov et al., 2011). The complex structures were solved by molecular replacement using the cognate HA and MEDI8852 Fab structures as search models. For the H5 complex, Phaser found solutions for two HA trimers as well as for two variable domains of MEDI8852. Electron density was visible for the other 4 variable domains as well and atomic models were placed in the appropriate positions. After rigid body refinement in Phenix, electron density appeared for the constant domains, which were manually placed in the structure. There was clear difference density for HCDR3 and LCDR1 of MEDI8852 in the complex. To build the model of the complex, an unbiased omit map was calculated for each domain (HA1 fusion, HA1 esterase, HA1 head, HA2, MEDI8852 heavy chain variable, MEDI8852 heavy chain constant, MEDI8852 light chain variable, MEDI8852 light chain constant) in Phenix. Figures of merit were calculated for these Fourier maps using SigmaA (Collaborative Computational Project, Number 4, 1994) and the maps were subjected to twofold and six fold non-crystallographic symmetry averaging in DM. A sharpening B factor of 75 Å<sup>2</sup> was applied to the structure factors before averaging. HCDR3 and LCDR1 were completely rebuilt into the averaged maps, and other residues were rebuilt according to the averaged maps as well as difference Fourier maps. The H7 structure was solved by molecular replacement in Phaser which found the one HA monomer as well as one variable and one constant domain of MEDI8852 in the asymmetric unit. The structure was refined by restrained coordinate refinement with global NCS restraints and TLS refinement in Refmac, and TLS and group B

factor refinement in Phenix with one TLS group per domain (see above). Crystallographic statistics are summarized in **Table S4**.

### **Hemagglutinin sequences analysis and phylogenic tree**

Hemagglutinin (HA) full-length gene sequences for all subtypes (H1 to H18) were obtained from NCBI Influenza Virus Resource (IVR) database (Bao et al., 2008) and the Global Initiative on Sharing Avian Influenza Database (GISAID) EpiFlu™ database as of July 20, 2015. For each HA subtype, after purging sequences that were identical or contained ambiguous nucleotide identities, the protein coding sequences were pairwise aligned with their respective HA subtype reference protein sequence. Sequences with different length than the reference were removed. In total, 12'472 H1, 404 H2, 12'263 H3, 1'005 H4, 694 H5, 1'152 H6, 119 H7, 119 H8, 1'838 H9, 590 H10, 487 H11, 153 H12, 67 H13, 16 H14, 10 H15, 7 H16, 2 H17 and 1 H18 isolates were analyzed respectively. The resulting protein datasets from IVR and GISAID were merged for each HA subtype and only the sequences not in IVR were added from GISAID. Finally, the occurrence of different amino acid identities was analyzed at HA residues 8 (HA1), 15, 16, 18, 19, 20, 21, 38, 42, 45, 48, 49 and 52 (HA2). The HA subtype reference protein sequences for HA subtypes 1 to 16 were aligned with Clustal  $\Omega$  (Sievers et al., 2011) and a phylogenic tree was derived by neighbor-joining method (bootstrapped 1,000 times) using MEGA 7 software (Kumar et al., 2016) (**Figure 2A**).

### **Affinity measurements using surface plasmon resonance and biolayer interferometry.**

Purified H1 and H3 HA proteins binding affinity to MEDI8852 Fab was measured using a ProteOn 3000 instrument. Briefly, anti-His-tag monoclonal antibody was amine-coupled to a GLC sensor chip with final anti-His-tag capture surface densities of ~2000 resonance units (RUs). Kinetic measurements were performed by injecting a 100 nM solution of each HA protein, and then bound with three-fold serial dilutions of MEDI8852 Fab. Binding data for all concentrations of each HA protein, plus buffer alone, were collected, and dissociation data were collected for 30 min. Binding data was globally fit to a 1:1 binding model (ProteOn Manager software) that included a term to correct for mass transport-limited binding, should it be detected. This analysis determined the kinetic rate constants ( $k_{on}$ ,  $k_{off}$ ), from which the apparent  $K_D$  was then calculated as  $k_{off}/k_{on}$ . Purified H5 and H7 binding to immobilized MEDI8852 was measured on an Octet RED biolayer interferometer (Pall ForteBio Corp., Menlo Park, CA, USA). Biotinylated anti-IgG-CH1 conjugate (Thermo Fisher Scientific) was first immobilized on streptavidin biosensors (Pall ForteBio Corp., Menlo Park, CA, USA) at a concentration of approximately 1  $\mu$ g/ml in 10 mM HEPES (pH 7.4), 150 mM NaCl, 3 mM EDTA and 0.005% Tween-20. MEDI8852 Fabs were then bound to the anti-IgG-CH1 conjugate and the binding of HA (at 0.2 – 200 nM) to the immobilized Fabs was measured at 25°C in a 400 second association step.

**SUPPLEMENTAL TABLES**

**Table S1: Viral Strain Designations, Related to Figure 2.**

| <b>Abbreviation</b> | <b>Isolate Name</b>                            | <b>HA Subtype Group</b> |
|---------------------|------------------------------------------------|-------------------------|
| H1 SC/18            | A/South Carolina/1/18 (H1N1)                   | Group 1                 |
| WSN/33              | A/Wilson Smith N/33 (H1N1)                     | Group 1                 |
| PR/34               | A/Puerto Rico/8/34 (H1N1)                      | Group 1                 |
| FM/47               | A/Fort Monmouth/1/47 (H1N1)                    | Group 1                 |
| NJ/76               | A/New Jersey/8/76 (H1N1)                       | Group 1                 |
| KW/86               | A/Kawasaki/9/86 (H1N1)                         | Group 1                 |
| TX/91               | <i>ca</i> A/Texas/36/91 (H1N1)                 | Group 1                 |
| BJ/95               | <i>ca</i> A/Beijing/262/95 (H1N1)              | Group 1                 |
| SZ/95               | <i>ca</i> A/Shenzhen/227/95 (H1N1)             | Group 1                 |
| NC/99               | <i>ca</i> A/New Caledonia/20/99 (H1N1)         | Group 1                 |
| SI/2006             | A/Solomon Island/3/2006 (H1N1)                 | Group 1                 |
| SD/2007             | <i>ca</i> A/South Dakota/06/2007 (H1N1)        | Group 1                 |
| CA/2009 (H1)        | A/California/7/2009 (H1N1)                     | Group 1                 |
| BR/2010             | A/Brisbane/10/2010 (H1N1)                      | Group 1                 |
| HK/2010             | A/Hong Kong/2212/2010 (H1N1)                   | Group 1                 |
| NH/2010             | A/New Hampshire/04/2010 H1N1                   | Group 1                 |
| NY/2012             | A/New York/36/2012 (H1N1)                      | Group 1                 |
| WA/2012             | A/Washington/24/2012 (H1N1)                    | Group 1                 |
| BO/2013             | A/Bolivia/559/2013 (H1N1)                      | Group 1                 |
| JP/57               | <i>ca</i> A/Japan/305/57 (H2N2)                | Group 1                 |
| MO/2006 (H2)        | <i>ca</i> A/swine/Missouri/4296424/2006 (H2N3) | Group 1                 |
| HK/2003             | <i>ca</i> A/Hong Kong/213/2003 (H5N1)          | Group 1                 |
| VT/2004 (H5)        | <i>ca</i> A/Vietnam/1203/2004 (H5N1)           | Group 1                 |
| AB/85               | <i>ca</i> A/mallard/Alberta/89/85 (H6N2)       | Group 1                 |
| HK/97 (H6)          | <i>ca</i> A/teal/Hong Kong/W312/97 (H6N1)      | Group 1                 |
| H12 ON/68           | A/turkey/Ontario/6118/68 (H8N4)                | Group 1                 |
| HK/97 (H9)          | <i>ca</i> A/chicken/Hong Kong/G9/97 (H9N2)     | Group 1                 |
| HK/99               | <i>ca</i> A/Hong Kong/1073/99 (H9N2)           | Group 1                 |
| H11 ME/74           | A/duck/Memphis/546/74 (H11N9)                  | Group 1                 |
| H12 AL/76           | A/duck/Alberta/60/76 (H12N5)                   | Group 1                 |



|              |                                                   |         |
|--------------|---------------------------------------------------|---------|
| H13 MA/77    | A/gull/Maryland/704/77 (H13N6)                    | Group 1 |
| H16 SW/99    | A/black-headed gull/Sweden/2/99 (H16N3)           | Group 1 |
| H17 GU/09    | A/little yellow-shouldered bat/Guatemala/164/2009 | Group 1 |
| H18 PU/10    | A/flat-faced bat/Peru/033/2010 (H18N11)           | Group 1 |
| rHK/68       | 7:1 A/Puerto Rico/8/34, A/HK/68 HA reassortant    | Group 2 |
| HK/68        | A/Hong Kong/8/68 (H3N2)                           | Group 2 |
| VC/75        | A/Victoria/3/75 (H3N2)                            | Group 2 |
| LA/87        | A/Los Angeles/2/87 (H3N2)                         | Group 2 |
| SG/93        | A/Shangdong/9/93 (H3N2)                           | Group 2 |
| WH/95        | 7:1 <i>ca</i> A/WH/95 (H3N1)                      | Group 2 |
| SY/97        | <i>ca</i> A/Sydney/5/97 (H3N2)                    | Group 2 |
| PA/99        | <i>ca</i> A/Panama/2007/99 (H3N2)                 | Group 2 |
| CA/2004      | <i>ca</i> A/California/7/2004 (H3N2)              | Group 2 |
| WI/2005      | A/Wisconsin/67/2005 (H3N2)                        | Group 2 |
| PT/2009 (H3) | <i>ca</i> A/Perth/16/2009 (H3N2)                  | Group 2 |
| VC/2011      | A/Victoria/361/2011 (H3N2)                        | Group 2 |
| BR/2011      | A/Berlin/93/2011 (H3N2)                           | Group 2 |
| NY/2012      | A/New York/39/2012 (H3N2)                         | Group 2 |
| TX/2012      | A/Texas/50/2012 (H3N2)                            | Group 2 |
| AM/2013      | A/American Samoa/4786/2013 (H3N2)                 | Group 2 |
| SW/2013      | A/Switzerland/9715293/2013 (H3N2)                 | Group 2 |
| NC/2014      | A/New Caledonia/71/2014 (H3N2)                    | Group 2 |
| PU/14        | A/Palau/6759/2014 (H3N2)                          | Group 2 |
| MN/2010      | A/Minnesota/11/2010 (H3N2v)                       | Group 2 |
| IN/2011      | A/Indiana/10/2011 (H3N2v)                         | Group 2 |
| H4 CZ/56     | A/duck/Czechoslovakia/56 (H4N6)                   | Group 2 |
| NT/2003      | <i>ca</i> A/Netherlands/219/2003 (H7N7)           | Group 2 |
| BC/2004      | <i>ca</i> A/British Columbia/CN-6/2004 (H7N3-LP)  | Group 2 |
| AN/2013      | <i>ca</i> A/Anhui/1/2013 (H7N9)                   | Group 2 |
| H10 GE/49    | A/chicken/Germany/N49 (H10N7)                     | Group 2 |
| H14 AS/82    | A/mallard/Astrakhan/263/82 (H14N5)                | Group 2 |
| H15 AU/79    | A/shearwater/West Australia/2576/79 (H15N9)       | Group 2 |

**Table S2. Binding Activity and Affinity Measurements of FY1 and MEDI8852, Related to Figure 2.**

| HA Protein (strain)             | KD (nM)  |      | EC <sub>50</sub> (µg/ml) |       |
|---------------------------------|----------|------|--------------------------|-------|
|                                 | MEDI8852 | FY1  | MEDI8852                 | FY1   |
| H1 (A/California/07/2009 H1N1)  | 0.34     | 1.73 | -                        | -     |
| H3 (A/Perth/16/2009 H3N2)       | 0.30     | 4.19 | -                        | -     |
| H5 (A/Vietnam/1194/2004 H5N1)   | 1.34     | ND   | -                        | -     |
| H7 (A/Turkey/Italy/214845/2002) | 0.48     | ND   | -                        | -     |
| H1 (A/California/7/2009 H1N1)   | -        | -    | 0.048                    | 0.072 |
| H2 (A/Swine/MO/2006 H2N3)       | -        | -    | 0.079                    | 0.171 |
| H3 (A/Perth/16/2009 H3N2)       | -        | -    | 0.030                    | 0.095 |
| H5 (A/Vietnam/1203/2004 H5N1)   | -        | -    | 0.061                    | 0.099 |
| H6 (A/teal/HK/W312/97 H6N1)     | -        | -    | 0.073                    | 0.258 |
| H7 (A/Netherlands/219/2003)     | -        | -    | 0.064                    | 0.045 |
| H9 (A/chicken/HK/G9/97 H9N2)    | -        | -    | 0.095                    | 0.129 |

**Table S3. Survival Rates and Lung Viral Titer Reductions after MEDI8852 Treatment, Related to Figure 4.**

| Virus     | Dose (mg/kg) | Time of MEDI8852 Administration Post Infection |      |      |      |                                           |       |       |       |
|-----------|--------------|------------------------------------------------|------|------|------|-------------------------------------------|-------|-------|-------|
|           |              | Survival Rate (%) <sup>a</sup>                 |      |      |      | Log Reduction in Viral Titer <sup>b</sup> |       |       |       |
|           |              | D1                                             | D2   | D3   | D4   | D1                                        | D2    | D3    | D4    |
| WSN/33 H1 | 10           | 88*                                            | 100* | 100* | 100* | 5.25*                                     | 4.59* | 3.76* | 2.62* |
|           | 3            | 100*                                           | 100* | 100* | 63*  | 3.55*                                     | 2.98* | 2.86* | 1.46* |
|           | 1            | 88*                                            | 88*  | 50*  | 63   | 1.79*                                     | 1.76* | 1.52* | 1.49* |
| rHK/68 H3 | 10           | 100*                                           | 100* | 100* | 38   | 4.26*                                     | 3.82* | 3.61* | 1.25* |
|           | 3            | 100*                                           | 50*  | 88*  | 38   | 3.07*                                     | 2.00* | 2.09* | 0.75* |
|           | 1            | 88*                                            | 63*  | 63*  | 25   | 1.10*                                     | 0.72* | 0.42* | 0.21  |

<sup>a</sup>Irrelevant isotype control mAb, R347 resulted in 13% survival for WSN/33 H1 and 0% survival for rHK/68 H3 infection

<sup>b</sup>Log viral titer reduction was calculated by comparing to R347 treated animals with lung viral titers of 9.51 log<sub>10</sub>TCID<sub>50</sub>/g for WSN/33 H1 and 7.99 log<sub>10</sub>TCID<sub>50</sub>/g for rHK/68 H3

\*p<0.05 using the Log Rank Mantel-Cox test for survival, and students t-test for lung viral titers of MEDI8852 treated animals verses R347 control treated animals

**Table S4. Data collection and refinement statistics, Related to Figure 5.**

|                                 | <b>H5/MEDI8852</b>     |         | <b>H7/MEDI8852</b>   |         | <b>MEDI8852</b>                               |         |
|---------------------------------|------------------------|---------|----------------------|---------|-----------------------------------------------|---------|
| <b>Data collection</b>          |                        |         |                      |         |                                               |         |
| Wavelength [Å]                  | 0.9795                 |         | 0.97949              |         | 0.97941                                       |         |
| Space group                     | C2                     |         | P321                 |         | P2 <sub>1</sub> 2 <sub>1</sub> 2 <sub>1</sub> |         |
| Unit cell [Å]                   | 151.26, 386.36, 165.86 |         | 144.0, 144.0, 130.92 |         | 65.2, 109.9, 139.9                            |         |
| Unit cell [°]                   | 90, 90.44, 90          |         | 90, 90, 120          |         | 90, 90, 90                                    |         |
| Resolution [Å]                  | 30 – 3.7               | (3.8 –  | 30 – 3.75            | (3.85 – | 86.4 – 1.9                                    | (1.95 – |
| Total reflections               | 214845                 | (15631) | 54954                | (4149)  | 320540                                        | (23640) |
| Unique reflections              | 98353                  | (7327)  | 15424                | (1155)  | 77785                                         | (5822)  |
| Completeness [%]                | 97.4                   | 98.3    | 93.5                 | 95.3    | 97.3                                          | (98.4)  |
| R <sub>meas</sub> [%]           | 16.2                   | 120.0   | 14.3                 | 148.7   | 11.2                                          | (85.0)  |
| CC1/2 [%]                       | 99.3                   | 28.7    | 99.7                 | 37.8    | 99.5                                          | (68.4)  |
| I/σI                            | 7.05                   | 0.99    | 9.89                 | 1.10    | 10.0                                          | (2.41)  |
| <b>Refinement</b>               |                        |         |                      |         |                                               |         |
| R <sub>work</sub> [%]           | 27.4                   |         | 22.4                 |         | 18.7                                          |         |
| R <sub>free</sub> [%]           | 28.5                   |         | 26.3                 |         | 21.7                                          |         |
| Macromolecule                   | 42466                  |         | 7143                 |         | 6759                                          |         |
| Ave. B-factor [Å <sup>2</sup> ] | 152.9                  |         | 151.4                |         | 29.5                                          |         |
| Solvent atoms                   | ---                    |         | ---                  |         | 573                                           |         |
| Ave. B-factor [Å <sup>2</sup> ] | ---                    |         | ---                  |         | 34.3                                          |         |
| r.m.s.d.                        |                        |         |                      |         |                                               |         |
| Bond lengths [Å]                | 0.018                  |         | 0.007                |         | 0.013                                         |         |
| Bond angles [°]                 | 1.47                   |         | 1.23                 |         | 1.53                                          |         |
| B-factor Wilson                 | 136.3                  |         | 137.0                |         | 24.2                                          |         |
| Ramachandran                    |                        |         |                      |         |                                               |         |
| Favored [%]                     | 97                     |         | 97                   |         | 98                                            |         |
| Outliers [%]                    | 0.13                   |         | 0.0                  |         | 0.0                                           |         |

## SUPPLEMENTAL REFERENCES

Adams, P.D., Afonine, P.V., Bunkóczi, G., Chen, V.B., Davis, I.W., Echols, N., Headd, J.J., Hung, L.-W., Kapral, G.J., Grosse-Kunstleve, R.W., et al. (2010). PHENIX: a comprehensive Python-based system for macromolecular structure solution. *Acta Crystallogr. D Biol. Crystallogr.* *66*, 213–221.

Bao, Y., Bolotov, P., Dernovoy, D., Kiryutin, B., Zaslavsky, L., Tatusova, T., Ostell, J., and Lipman, D. (2008). The influenza virus resource at the National Center for Biotechnology Information. *J Virol* *82*, 596–601.

Benjamin, E., Wang, W., McAuliffe, J.M., Palmer-Hill, F.J., Kallewaard, N.L., Chen, Z., Suzich, J.A., Blair, W.S., Jin, H., and Zhu, Q. (2014). A broadly neutralizing human monoclonal antibody directed against a novel conserved epitope on the influenza virus H3 hemagglutinin globular head. *J Virol* *88*, 6743–6750.

Brochet, X., Lefranc, M.-P., and Giudicelli, V. (2008). IMGT/V-QUEST: the highly customized and integrated system for IG and TR standardized V-J and V-D-J sequence analysis. *Nucleic Acids Res* *36*, W503–W508.

Collaborative Computational Project, Number 4 (1994). The CCP4 suite: programs for protein crystallography. *Acta Crystallogr. D Biol. Crystallogr.* *50*, 760–763.

Emsley, P., and Cowtan, K. (2004). Coot: model-building tools for molecular graphics. *Acta Crystallogr. D Biol. Crystallogr.* *60*, 2126–2132.

Jin, H., Lu, B., Zhou, H., Ma, C., Zhao, J., Yang, C.-F., Kemble, G., and Greenberg, H. (2003). Multiple amino acid residues confer temperature sensitivity to human influenza virus vaccine strains (FluMist) derived from cold-adapted A/Ann Arbor/6/60. *Virology* *306*, 18–24.

Kabsch, W. (2010). XDS. *Acta Crystallogr. D Biol. Crystallogr.* *66*, 125–132.

Kepler, T.B. (2013). Reconstructing a B-cell clonal lineage. I. Statistical inference of unobserved ancestors. *F1000Res* *2*, 103.

Kumar, S., Stecher, G., and Tamura, K. (2016). MEGA7: Molecular Evolutionary Genetics Analysis version 7.0 for bigger datasets. *Mol Biol Evol* msw054.

McCoy, A.J., Grosse-Kunstleve, R.W., Adams, P.D., Winn, M.D., Storoni, L.C., and Read, R.J. (2007). Phaser crystallographic software. *J Appl Crystallogr* *40*, 658–674.

Murshudov, G.N., Skubák, P., Lebedev, A.A., Pannu, N.S., Steiner, R.A., Nicholls, R.A., Winn, M.D., Long, F., and Vagin, A.A. (2011). REFMAC5 for the refinement of macromolecular crystal structures. *Acta Crystallogr. D Biol. Crystallogr.* *67*, 355–367.

Pappas, L., Foglierini, M., Piccoli, L., Kallewaard, N.L., Turrini, F., Silacci, C., Fernandez-Rodriguez, B., Agatic, G., Giacchetto-Sasselli, I., Pellicciotta, G., et al. (2014). Rapid development of broadly influenza neutralizing antibodies through redundant mutations. *Nature* *516*, 418–422.

Sievers, F., Wilm, A., Dineen, D., Gibson, T.J., Karplus, K., Li, W., Lopez, R., McWilliam, H., Remmert, M., Söding, J., et al. (2011). Fast, scalable generation of high-quality protein multiple sequence alignments using Clustal Omega. *Mol. Syst. Biol.* *7*, 539–539.

Skehel, J.J., and Schild, G.C. (1971). The polypeptide composition of influenza A viruses. *Virology* *44*, 396–408.

Traggiai, E., Becker, S., Subbarao, K., Kolesnikova, L., Uematsu, Y., Gismondo, M.R., Murphy, B.R., Rappuoli, R., and Lanzavecchia, A. (2004). An efficient method to make human monoclonal antibodies from memory B cells: potent neutralization of SARS coronavirus. *Nat. Med.* *10*, 871–875.

Wang, T.T., Tan, G.S., Hai, R., Pica, N., Petersen, E., Moran, T.M., and Palese, P. (2010). Broadly protective monoclonal antibodies against H3 influenza viruses following sequential immunization with different hemagglutinins. *PLoS Pathog* *6*, e1000796.

Ye, J., Ma, N., Madden, T.L., and Ostell, J.M. (2013). IgBLAST: an immunoglobulin variable domain sequence analysis tool. *Nucleic Acids Res* *41*, W34–W40.
